# Supplementary material for: Biogeochemical functioning of Lake Alaotra (Madagascar): a reset of aquatic carbon sources along the land–ocean aquatic continuum
Source: Copernicus journal article supplement (doi:10.5194/bg-22-2403-2025), 2025-05-27
Supplement: Supplementary file 1 [file bg-22-2403-2025-supplement.zip]

## Sheet: Info
Biogeochemical functioning of Lake Alaotra ( Madagascar): reset of aquatic carbon sources along the land-ocean gradient
Vao F. Razanamahandry*, Alberto V.Borges, Liesa Brosens, Cedric Morana, Tantely Razafimbelo, Tovonarivo Rafolisy, Gerad Govers and Steven Bouillon*
* corresponding authors, e-mail : vaofenotiana.razanamahandry@kuleuven.be/razfenotiana@gmail.com, steven.bouillon@kuleuven.be

## Sheet: Coordinates 
Station name	Latitude	Longitude (°E)	Elevation (m)
C. Ambomandroso	17°37'45.18"S	48°11'56.88"E	782
C. Ampasikely	17°39'02.40"S	48°11'27.42"E	772
C. Ananas	17°47'39.24"S	48°10'36.90"E	768
C. Andombon'Adala	17°51'54.90"S	48°23'50.94"E	774
C. Andreba Gare	17°36'54.90"S	48°30'57.18"E	770
C. Anony	17°24'27.36"S	48°24'40.14"E	761
C. Bevava	17°55'45.84"S	48°13'58.68"E	790
C. Bizo	17°42'53.88"S	48°10'29.64"E	774
C. Mandika Namana	17°52'06.42"S	48°23'31.08"E	777
C. Mariane	17°52'15.48"S	48°23'02.40"E	786
C. Merimanjaka 2	17°50'48.06"S	48°19'26.16"E	774
C. Merimanjaka 3	17°50'57.60"S	48°19'13.20"E	775
C. Tetezampotsy	17°40'14.64"S	48°11'21.00"E	775
C. Tetezampotsy Ambaibo	17°44'42.78"S	48°10'29.16"E	772
R. Ambadrika	17°45'51.06"S	48°26'33.18"E	775
R. Andrangorona	17°49'43.50"S	48°25'31.26"E	743
R. Anony	17°24'22.02"S	48°24'48.00"E	763
R. Ivakaka	17°33'53.10"S	48°15'50.52"E	768
R. Lohafasika	17°48'11.76"S	48°06'08.52"E	768
R. Ranofotsy	17°52'48.72"S	48°14'06.96"E	826
R. Ranofotsy (manainga-zipo)	17°52'48.72"S	48°14'06.96"E	741
R. Ranofotsy Andilanantoby	17°56'45.30"S	48°14'06.18"E	826
R. Sahabe	17°48'47.86"S	48°11'27.70"E	765
R. Sahabe 1	17°48'46.72"S	48°12'22.13"E	765
R. Sahabe 2	17°48'55.62"S	48°11'46.66"E	765
R. Sahamaloto	17°25'09.30"S	48°18'41.04"E	816
R. Sahamena	17°59'30.06"S	48°15'42.36"E	886
LW 1	17° 26'27.24"S	48°33'44.28"E	764.401
LW 2	17° 31'55.74"S	48°28'52.92"E	758.915
LW 3	17° 34'01.38"S	48°28'31.20"E	771.716
LW 4	17° 35'03.48"S	48°28'24.48"E	774.154
LW 5	17° 35'12.72"S	48°28'35.82"E	774.154
LW 6	17° 36'33.54"S	48°30'03.90"E	752.819
LW 7	17° 36'33.66"S	48°30'02.70"E	752.819
LW 8	17° 36'50.58"S	48°30'07.02"E	752.819
LW 9	17° 22'13.02"S	48°33'02.34"E	906.431
R. Maningory (outflow)	17° 24'10.86"S	48°38'10.38"E	744.59
SC-M1	17°37'28.14"S	48°26'21.31"E	756
SC-M2	17°37'27.94"S	48°26'18.10"E	755
SC-M3	17°40'6.82"S	48°27'28.17"E	757

## Sheet: Inflowing rivers and canals
Station name	Date (mm/dd/yy)	Season	Group	DIC (µmol/L)	pCO2 (ppm)	d13C-DIC	POC (mg/L)	PN (mg/L)	POC/PN	d13C-POC	d15N-PN	TSM (mg/L)	%POC	DOC mg C L-1	d13C-DOC	T (°C)	DO %L	DO mg/L	C us/cm	pH	TA (µmol/L)	CH4 (nmol/L)	N2O (nmol/L)	Na (µmol L-1)	Mg (µmol L-1)	Si (µmol L-1)	P (µmol L-1)	S (µmol L-1)	K (µmol L-1)	Ca (µmol L-1)	Fe(µmol L-1)	Sr (µmol L-1)	Ba (µmol L-1)	d18O-H2O	d2H-H2O
R. Andrangorona	2018-04-26	R	inflowing river	2148.47	1398.5	-8.244	4.46415	0.420391	10.6191	-24.9969		11.1111		2.38494	-22.6207	27	87.8	6.38	196.2	8.66	2115	155.7	5.88	670.983	401.626	459.734	0.975541	43.94	33.223	363.091	0.0741548	1.79823	2.64363	-4.52825	-35.87
R. Sahamaloto	2018-04-26	R	inflowing river	442.226	1226.08	-6.007	2.08615	0.198251	10.5228	-25.7122		121.818	1.71251	2.2289	-23.7418	24	92.3	7.17	36.6	8.4	400	766.6	1149.87	211.089	63.5776	183.523	1.23724	9.56129	53.8636	46.8451	7.10612	0.325766	1.80501	-4.76342	-33.19
R. Sahabe	2018-04-26	R	inflowing river	350.958	3152.26	-9.21	1.47776	0.150668	9.80802	-27.2177	3.59956	21.6667	6.82041	3.94579	-27.7732	23.7	54.4	4.17	36.3	7.61	240	790.4	6.29	120.516	35.0884	126.223	2.95063	8.57735	38.437	44.5549	6.0093	0.211959	1.35617	-3.68858	-30.57
R. Anony	2018-05-01	D	inflowing river	808.268	1222.52	-6.811	1.45925	0.164081	8.89349	-26.5704	5.02073	90	1.62139	3.04427	-27.7334	21.4	95.4	7.78	61.3	8.04	764	59.9	6.23	241.8	120.565	188.628		21.0137	32.4125	90.194	2.0308	0.49328	1.19209	-3.82506	-32.97
R. Ranofotsy (manainga-zipo)	2018-05-01	D	inflowing river	829.337	789.557	-7.292	1.73469	0.190345	9.11343	-26.565	2.87829	157.737	1.09974	1.61695	-24.518	24.2	90.6	7.04	51.9	8.16	805	115.6	5.8	278.442	110.899	215.108		6.7281	38.8659	83.6644	1.58656	0.58692	1.68991	-2.74181	-27.48
R. Ranofotsy Andilanantoby	2018-05-13	D	inflowing river	783.225	1181.55	-7.766	1.39874	0.132417	10.5632	-22.9977	4.64738	66.1905	2.11321	2.76927	-27.4722	24.2	101.1	7.74	63.1	8.76	744	719	6.29	267.803	108.606	222.845		6.04431	34.1307	87.4511	2.29821	0.723748	1.4894	-4.18443	-33.16
R. Sahamaloto	2018-05-18	D	inflowing river	527.293	1355.3	-6.413	1.04081	0.107664	9.66725	-25.5791		40	2.60204	1.66155	-24.7223	25	98.5	7.46	47.9	7.23	482	306.4	5.87	220.115	70.5848	231.291		15.4525	46.5116	56.9914	11.2995	0.409409	1.1737	-2.57781	-23.51
R. Andrangorona	2018-05-19	D	inflowing river	2033.23	1089.52	-8.181	1.36232	0.158562	8.59172	-23.1881	5.63112	73.5	1.8535	1.50878	-20.8613	17.2	101.7	8.99	16.5	6.8	1996	125.6	7.1	848.122	533.333	502.602		50.3096	37.9705	480.687	1.93702	1.71069	1.62114	-4.57004	-37.81
R. Ranofotsy	2018-05-19	D	inflowing river	730.561	796.617	-7.616	1.14649	0.138447	8.28107	-24.8837	6.18086	87	1.3178	1.37927	-23.5512	25	100.7	7.6	65.2	6.91	706	124.9	5.87	291.995	121.998	253.697		15.6967	38.147	92.8548	0.139757	0.585918	1.42669	-3.37869	-30.84
R. Sahabe	2018-05-19	D	inflowing river	472.778		-8.794	0.936566	0.0845031	11.0832	-26.0519	5.11941	18	5.20315	1.43655	-25.3931	20.9	91.5	7.44	21.8			3131	6.68	139.893	36.777	178.624		13.754	32.4515	42.6116	1.48193	0.211591	1.02151	-1.97885	-34.38
R. Anony	2018-05-19	D	inflowing river	678.632	1014.29	-7.356	1.03776	0.120285	8.62752	-26.4226		68.6667	1.5113	1.74173	-23.6761	22.3	100.34	8.16	64.7	6.54	643	56.9	6.28	256.899	125.498	203.974		27.013	31.7365	94.7887	1.30132	0.504984	1.38276	-3.35716	-31.22
R. Ranofotsy	2018-06-09	D	inflowing river	380.337	890.48	-7.288	1.30306	0.143281	9.09448	-25.7088	6.63113	63.8095	2.04211	2.47671	-30.8998	19.01	103.8	8.86	56.3	7.18	345	132.4	7.33	298.485	120.344	246.574		15.7669	34.4693	85.3567	0.562113	0.546118	1.49267	-4.94253	-36.32
R. Sahamaloto	2018-06-09	D	inflowing river	554.147	914.803	-8.229	0.969973	0.0800415	12.1184	-24.6009		32.381	2.99551	1.33911	-24.2744	21.5	99.6	8.09	42.4	7.39	521	189.8	7.12	227.022	68.1171	233.355		13.3366	42.8792	50.1135	2.66864	0.356826	1.12401	-4.29409	-33.51
R. Anony	2018-06-09	D	inflowing river	720.757	1126.37	-6.861	0.833987	0.0835663	9.97995	-27.0338	3.78369	53.8095	1.54989	1.67679	-23.8602	20.7	103.8	8.47	62.4	7.3	679	46.9	6.79	256.049	128.534	212.981		27.2963	30.6169	97.1484	1.40783	0.551924	1.07008	-4.82374	-33.74
R. Sahabe	2018-06-09	D	inflowing river	372.299	2850.45	-8.5	1.08308	0.0979767	11.0545	-25.3491		24.2857	4.45975	1.198	-26.3948	19.4	85.8	7.37	20.2	7.01	259	1382.9	7.43	102.99	26.3477	170.112		13.029	21.6643	35.7778	5.04141	0.155906	0.400608	-5.10567	-37.75
R. Andrangorona	2018-06-10	D	inflowing river	2081.06	1642.23	-7.672	1.43477	0.151436	9.47444	-24.4618	3.52021	55.7143	2.57523	1.63684	-21.9136	23	97.6	7.71	188	7.6	2030	88.2	6.34	634.703	381.287	532.825		48.3265	35.471	353.847	0.901012	1.67093	1.55872	-5.51054	-38.79
C. Ambomandroso	2019-01-17	R	Inflowing canal	426.961	5341.96	-8.01523	1.07308	0.0966544	11.1023	-25.4528	5.17185	26.6667	4.02406	2.51826	-22.112	23.7			41.4	6.34	330	8457.91	8.38	131.521	48.3742	150.28	0.230781	8.21586	44.543	44.9078	4.12145	0.201142	1.02302	-3.5822	-32.5
C. Ampasikely	2019-01-17	R	Inflowing canal	417.972	11477.7	-12.7365	3.26475	0.362711	9.00097	-23.0401	4.23607	32.381	10.0823	5.43196	-21.8258	26.2			35.8	6.43	239	2682.27	6.26	145.758	31.0763	76.2571	0.363496	6.04183	33.7396	35.7252	6.48033	0.168762	1.21485	0.991731	-20.16
C. Tetezampotsy	2019-01-17	R	Inflowing canal	339.797	1766.81	-8.92866	1.01194	0.0871909	11.606	-24.5428	17.6055	65.7143	1.53991	1.69163	-21.3612	27.8			45.5	6.45	305	342.13	7.6	135.145	49.6865	132.721	0.157565	11.371	35.5947	41.2498	0.891983	0.237166	1.29272	-3.27559	-30.11
C. Bizo	2019-01-17	R	Inflowing canal	387.588	2248.94	-9.16387	0.560141	0.0652007	8.59103	-25.4302	4.7477	14.1176	3.96766	1.55571	-21.609	26			36.1	6.54	344	1457.6	7.9	118.804	33.8234	174.344	0.213909	6.04554	34.2606	32.0832	4.93969	0.195789	1.28324	-3.34551	-30.07
R. Sahamena	2019-01-17	R	inflowing river	284.727	2017.85	-9.65657	0.815818	0.0699923	11.6558	-24.0776	5.57057	26.4706	3.08198	2.01172	-22.2839	25.4			26.7	6.61	242	1214.06	8.35	90.7913	23.5308	147.081	0.213985	3.12373	27.433	26.7484	8.78456	0.120966	1.01573	-5.19167	-38.71
C. Tetezampotsy Ambaibo	2019-01-17	R	Inflowing canal	344.993	3579.76	-9.01078	1.52262	0.159185	9.56505	-24.2606	8.04428	71.1765	2.13921	1.6035	-22.6892	30.4			36.2	6.53	292	1305.07	12.12	119.292	27.989	157.671	0.248947	7.86361	29.6217	28.6298	1.68136	0.137026	1.13444	-3.09608	-32.55
C. Ananas	2019-01-17	R	Inflowing canal	350.35	3691.94	-10.2709	1.09304	0.102866	10.6258	-24.8409	5.52683	44.7059	2.44495	2.32085	-22.4375	26.9			36.5	6.52	288	9938.79	6.69	129.934	33.4095	153.434	0.238213	12.073	24.3145	45.6591	10.3666	0.193103	1.0987		-35.78
R. Sahabe	2019-01-17	R	inflowing river	492.065	10183.1	-13.7898	1.06741	0.105536	10.1142	-25.3128	4.88705	28.8235	3.70328	3.01492	-23.0263	26.8			35.2	6.54	337	1173.12	5.28	116.545	40.1788	145.037	0.24873	7.56908	26.4382	44.6	4.42951	0.227011	1.22979	-4.2772	-36.1
R. Ranofotsy Andilanantoby	2019-01-17	R	inflowing river	598.317	1734.96	-8.66812	1.13362	0.107778	10.5181	-23.7953	6.79726	112.353	1.00898	2.11385	-21.0124	35.5			75.9	6.68	574	2030.09	6.57	264.438	82.2111	214.521	0.284905	14.1262	56.9152	58.8508	3.95893	0.348978	1.55515	-1.30059	-28.21
C. Bevava	2019-01-17	R	Inflowing canal	527.342	1209.04	3.17411	3.82364	0.396338	9.64743	-21.2536	4.80771	40	9.5591	4.52055	-19.5375	29.7			60.2	6.87	505	1314.7	5.97	246.616	67.6958	74.9712	0.199579	11.3228	35.6397	42.0244	1.4552	0.289189	1.3382	-0.449239	-12.34
R. Ivakaka	2019-01-18	R	inflowing river	506.282	3765.86	-12.8876	0.98889	0.0834603	11.8486	-24.1099	-1.1884	37	2.67268	2.56636	-22.2909	23.7			56.5	7.21	431	773.32	9.64	174.685	52.9439	234.53	1.59713	20.278	39.8705	54.0065	7.41667	0.279898	1.09825	-3.88287	-25.81
R. Sahamaloto	2019-01-18	R	inflowing river	569.919	2006.21	-9.06451	0.888221	0.0871909	10.1871	-23.9866	6.83082	50.5	1.75885	3.10563	-21.1986	24.6			68.3	7.3	529	1279.36	6.81	224.058	75.2142	228.64	0.285889	12.1992	60.9297	53.6375	8.89812	0.365208	1.69941	-4.07164	-33.47
C. Anony	2019-01-18	R	Inflowing canal	643.998	7695.44	-14.4367	2.59559	0.257842	10.0666	-23.1761	5.18711	301	0.862321	4.5723	-22.5521	26.5			96.4	7.41	522	478.36	7.01	260.755	96.5245	198.503	0.227724	26.6226	58.7263	69.4159	0.560694	0.395021	1.39399	-3.73434	-35.06
R. Anony	2019-01-18	R	inflowing river	625.579	2225.42	-8.58296	2.57344	0.239155	10.7606	-21.9655	6.91728	318	0.809259	2.33744	-20.9039	27.3			72	7.52	585	141.72	6.2	258.299	95.8496	197.321	0.234696	25.487	58.0548	69.0302	0.472274	0.39355	1.37792	-3.85233	-33.1
R. Andrangorona	2019-01-18	R	inflowing river	2071.81	2662.36	-8.36398	2.65189	0.250004	10.6074	-22.7139	4.65412	75	3.53586	2.82009	-18.7216	37			273.7	7.63	2047	1004.41	5.29	665.084	370.219	486.664	0.637817	50.9105	53.5838	323.23	0.248253	1.53876	1.97835	-2.65108	-31.94
C. Andreba Gare	2019-01-19	R	Inflowing canal	1081.98	2774.29	-11.3922	2.36666	0.271464	8.71815	-24.9819	5.42919	780.667	0.303159	3.17778	-20.4898	25.4			139.8	7.62	1032	472.83	8.93	389.074	164.484	238.736	1.06006	38.5156	87.5319	175.266	0.071453	0.634924	0.898267	-4.99219	-39.67
R. Lohafasika	2019-01-20	R	inflowing river	1410.12	1973.09	-7.78408	3.31378	0.38111	8.72749	-21.3948	8.19196	156	2.12422			26.8			165.5	7.76	1374	245.59	6	683.284	275.858	258.045	0.565504	23.9148	88.486	217.776	0.266121	1.09737	1.93475	-6.82428	-33.31
C. Andombon'Adala	2019-01-20	R	Inflowing canal	1365.61	3868.18	-9.64846	1.84246	0.183982	10.0143	-23.4435	4.9969	107.5	1.71392	3.07352	-23.9165	25.7			144	7.94	1300	893.47	6.07	439.097	215.153	226.816	0.258656	15.0604	65.3171	209.777	0.115869	0.937228	1.84093	-1.44738	-27.83
C. Mandika Namana	2019-01-20	R	Inflowing canal	1421.75	7438.67	-11.8383	1.68231	0.183144	9.18575	-23.2323	5.72111	53.5	3.14451	3.92085	-24.3624	27.7			143.8	7.95	1311	948.92	5.77	428.629	225.688	157.157	0.298179	8.55911	46.6505	206.518	1.33441	0.941892	1.79421	-0.906834	-18.8
C. Mariane	2019-01-20	R	Inflowing canal	811.222	2092.65	-6.38909	0.769338	0.0789938	9.73923	-25.9312	4.72735	28	2.74764	2.42542	-20.1003	26.2			91.9	7.98	773	342.08	6.46	285.531	108.106	204.093	0.271955	15.9586	67.4903	131.146	0.601837	0.498868	1.1183	-2.76269	-25.53
C. Merimanjaka 2	2019-01-20	R	Inflowing canal	462.288	1615.12	-5.43003	1.95371	0.232395	8.40685	-25.626	4.26557	143.5	1.36147	2.04627	-20.8776	29.5			52.1	7.96	434	294.06	5.57	175.524	72.4611	190.068	0.223073	10.6502	45.0321	62.8004	1.08685	0.317536	1.06932	-3.89112	-32.34
C. Merimanjaka 3	2019-01-20	R	Inflowing canal	521.275	1285.99	-5.58616	1.84329	0.130641	14.1096	-23.592	4.98571	178.5	1.03266	1.91279	-21.4424	29.7			51.9	7.93	498	165.13	6.26	157.46	61.0712	200.882	0.275074	11.7266	42.4878	54.8644	1.95108	0.274603	1.1243	-3.47623	-34.96
C. Ambomandroso	2019-01-24	R	Inflowing canal	483.652	5063.16	-22.5846	2.23161	0.178181	12.5244	-22.7595	5.3234	41.3333	5.39905	1.68919	-22.6785	22.1	81.5	6.51	30.4	5.77	384	7107.69	9.36	121.82	44.7855	143.834	0.25641	5.98364	40.3789	38.8828	2.75236	0.219129	1.33193	-4.76853	-40.84
C. Ampasikely	2019-01-24	R	Inflowing canal	502.693	9853.81	-9.57648	1.89627	0.140652	13.482	-24.3445	5.35595	18.5	10.2501	5.63592	-22.5317	23.1	49.2	3.84	27.4	5.61	328	2211.52	6.85	151.333	31.6043	70.5343	0.400146	8.39523	39.6913	33.3634	7.90553	0.160973	0.93428	-4.4156	-35.25
C. Tetezampotsy	2019-01-24	R	Inflowing canal	457.114	4929.18	-14.7448	1.75366	0.162163	10.8142	-22.538	5.37121	36	4.87127	2.64003	-24.0714	24	71.3	5.5	28.1	5.57	368	1146.31	6.43	126.151	45.1483	99.6112	0.213616	4.11813	26.1929	32.982	2.69902	0.189678	1.174	-4.08674	-40.05
C. Bizo	2019-01-24	R	Inflowing canal	421.693	4397.35	-14.4934	1.04006	0.0817832	12.7172	-25.331	3.65222	23	4.52198	2.07839	-24.3561	23.7	58	4.53	23.1	5.53	340	1697.84	7.67	116.452	36.2107	153.565	0.196811	2.444	29.4638	30.5951	2.68259	0.189287	1.25653	-3.31193	-36.81
R. Sahamena	2019-01-24	R	inflowing river	302.409		-11.7541	0.706382	0.0592967	11.9127	-26.4598	6.88371	24.5	2.88319	1.97458	-23.6775	23.2	82.9	6.47	17.4			1463.88	8.57	78.1872	20.435	133.944	0.196461	4.03679	22.7563	21.6555	5.28394	0.0953487	0.9056	-3.6375	-44.85
C. Tetezampotsy Ambaibo	2019-01-24	R	Inflowing canal	321.529	1791.74	-10.4605	0.584023	0.0268503	21.751	-25.0201	4.91756	60.5	0.965327	1.53973	-21.8215	24	79.6	6.13	23.3	5.67	281	698.16	11.8	122.182	30.876	148.298	0.195577	7.21525	27.7532	25.7945	0.736237	0.140786	0.92188	-3.24562	-32.94
C. Ananas	2019-01-24	R	Inflowing canal	351.161	1774.09	-8.31633	0.549862	0.0259091	21.2227	-23.9759	6.0527	32	1.71832	2.2656	-23.3212	23.5	84.1	6.54	24.5	5.66	313	680.71	7.38	99.6459	32.1095	142.847	0.214737	8.91464	24.2387	43.4913	8.43943	0.178354	0.935524	-2.93684	-46.69
R. Sahabe 1	2019-01-24	R	inflowing river	439.086		-12.1526	0.725126	0.0401814	18.0463	-24.6404	6.21646	30	2.41709	2.71279	-23.784	25	57.5	4.49	31			910.24	6.07	111.087	40.0377	145.042	0.243015	5.43521	24.8673	44.1759	6.71836	0.222111	1.05044	-5.05502	-40.39
R. Ranofotsy Andilanantoby	2019-01-24	R	inflowing river	639.688	1375.23	-8.86986	1.33442	0.116899	11.4152	-24.156	6.42041	128.667	1.03711	1.921	-21.7605	27.7	84.1	6.03	57.1	6.31	613	1562.18	6.75	231.906	87.3477	207.653	0.23925	9.24887	43.431	61.5572	2.81961	0.387039	1.41583	-3.74592	-35.55
C. Bevava	2019-01-24	R	Inflowing canal	533.856	1249.04	3.2907	4.02849	0.430616	9.35516	-20.5951	4.68446	6.5	61.9767	4.12542	-20.1736	26.4	86.8	6.36	49.2	6.37	508	1168.75	6.97	261.323	68.9398	69.3994	0.145834	9.80904	35.5901	37.1905	0.529538	0.274256	1.90096	-0.329809	-14.38
C. Merimanjaka 3	2019-01-24	R	Inflowing canal	850.521	17977.8	-10.6278	1.76989	0.159883	11.0699	-24.6008	6.14385	140	1.26421	2.32588	-23.2808	27.6	77.1	5.47	57.5	6.46	591	1243.99	6.35	165.973	99.241	183.701	0.222397	6.64187	38.1954	82.4953	0.959652	0.442314	1.55156	-3.75287	-39.12
C. Merimanjaka 2	2019-01-24	R	Inflowing canal	498.84	1273.4	-6.04237	2.6986	0.220431	12.2424	-22.9204	6.89394	222.667	1.21195	1.72298	-21.7462	27.4	86.4	6.24	44.2	6.32	474	154.67	5.92	162.738	63.0922	205.34	0.244007	12.93	40.0337	55.6059	2.75378	0.277097	1.25913	-4.30341	-38.99
C. Mariane	2019-01-24	R	Inflowing canal	797.043	1946.66	-6.27858	1.33673	0.136322	9.80565	-25.7529	5.75687	24	5.5697	1.93577	-22.0698	25.8	90	6.7	81	6.27	759	456.57	6.24	277.828	106.625	197.954	0.210592	15.4912	62.6498	126.853	1.28685	0.495073	1.31314	-2.547	-25.71
C. Mandika Namana	2019-01-24	R	Inflowing canal	1134.15	3951.77	-11.1408	0.605267	0.0573495	10.554	-27.6721	5.27936	11.5	5.26319	3.38691	-24.8321	28.3	79.3	5.6	108.3	6.46	1074	1386.31	4.95	332.404	177.004	133.442	0.227486	6.14961	43.2471	162.389	0.879327	0.73809	1.8215	-3.31468	-36.38
C. Andombon'Adala	2019-01-24	R	Inflowing canal	1061.07	3488.45	-9.71335	2.76496	0.295092	9.36983	-22.4561	6.93075	600	0.460826	2.11492	-21.9701	26	70.7	5.24	109.4	6.52	1002	1084.98	6.86	395.705	164.183	192.214	0.248586	29.0836	60.0014	155.119	0.111467	0.70218	2.33465	-3.86072	-36.34
R. Lohafasika	2019-01-24	R	inflowing river	994.602	2786.2	-6.82604		1.74062	9.33951	-19.8747	6.22399	1182.5		3.85464	-20.6666	29.2	84.1	5.88	107.1	6.8	951	364.96	5.98	514.907	137.191	223.14	0.479304	27.5209	65.8821	106.787	3.50395	0.62022	2.78438	-3.64488	-35.44
R. Ambadrika	2019-01-24	R	inflowing river	569.111	1793.31	-6.06873		1.3961	9.90204	-19.6228	7.51157	1392.5		3.22146	-21.3747	29.2	85	5.94	53.5	6.9	538	128.1	5.86	297.382	66.0558	283.194	0.586037	33.4968	30.5959	53.9966	5.74928	0.269201	2.86933	-2.13083	-33.39
R. Andrangorona	2019-01-25	R	inflowing river	2091.54	1883.69	-8.40858	1.15173	0.15685	7.34291	-22.1093	8.90148	51.5	2.23638	2.34886	-21.3978	24.8	75.1	5.82	174	6.78	2061	11449.2	6.09	665.534	405.014	419.961	0.644505	41.3203	42.3077	347.887	0.500062	1.58763	1.92365	-1.98102	-34.11
R. Anony	2019-01-25	R	inflowing river	662.689	3919.83	-8.37411	2.22637	0.152432	14.6056	-22.9954	8.90446	195	1.14173	3.22237	-22.5684	26.3	85	6.27	63.9	6.77	596	160.34	5.87	250.199	98.9604	205.009	0.347017	24.4352	50.1873	69.0969	1.14739	0.403506	1.18227	-4.01678	-33.81
C. Anony	2019-01-25	R	Inflowing canal	671.777	3314.35	-12.0167	5.75788	0.621606	9.26291	-24.1807	4.30544	497	1.15853	5.03942	-23.3838	26.7	68.7	5.03	104.9	6.75	615	542.78	6.56	530.994	125.618	246.631	0.334085	113.933	55.7189	81.8544	0.181675	0.517129	2.1468	-1.93494	-32.8
R. Ivakaka	2019-01-25	R	inflowing river	403.615	3363.99	-11.374	1.18571	0.0784907	15.1064	-24.2778	10.331	36	3.29364	2.54627	-23.2263	27.9	72.3	5.17	46.4	6.82	348	329.57	0.09	142.188	42.7182	207.09	0.310108	10.0766	35.3073	42.0854	6.05156	0.216963	0.99766	-3.35738	-37.79
R. Sahamaloto	2019-01-26	R	inflowing river	552.358	1894.14	-8.43089	1.64211	0.116566	14.0874	-23.9203	8.45083	66	2.48804	3.27489	-21.8301	23.4	79.4	6.18	46.1	6.38	511	1172.3	6.49	219.453	70.8238	216.474	0.302276	10.4301	56.2365	49.3153	7.41093	0.33358	1.44218	-4.94311	-39.58
C. Bevava	2019-01-28	R	Inflowing canal				4.78978	0.560584	8.54428	-19.4655	5.18684	559	0.856849	6.61887	-20.0164						312			191.472	27.7866	322.451	0.415201	13.8544	19.6807	28.2966	3.48803	0.175818	0.895919	-4.5634	-47.81
C. Bevava	2019-01-28	R	Inflowing canal				7.45544	0.635507	11.7315	-19.7349	4.89536	442.857	1.68349	4.19893	-20.6002						260			193.629	14.7225	282.065	0.511721	20.1486	20.1122	14.5036	6.59266	0.0911879	1.40082	-7.0775	-59.12
C. Ambomandroso	2019-01-31	R	Inflowing canal	507.813	6464.92	-7.73136	3.27467	0.251196	13.0363	-21.5362	8.52444	56.5	5.79587	1.71005	-22.144	21.8	76.1	6.11	29.9	6.44	381	13775.5	9.05	131.26	44.971	150.734	0.251629	5.48842	40.0453	35.3332	3.01877	0.204611	1.2968	-3.88316	-36.43
C. Ampasikely	2019-01-31	R	Inflowing canal	514.932	11020.7	-13.5445	0.958307	0.0713209	13.4366	-22.67	7.07798	18.5	5.18004	4.96697	-21.8969	23.1	45.4	3.58	27.5	6.38	319	2309.72	7.5	139.202	36.2319	64.4271	0.328758	3.66941	25.0142	35.6753	7.52639	0.182144	0.889889	-3.01979	-30.4
C. Tetezampotsy	2019-01-31	R	Inflowing canal	308.961	2624.51	-10.1341	1.54376	0.0872206	17.6995	-24.4611	8.63785	97.5	1.58335	1.47854	-23.2047	22.1	66.3	5.23	30.4	6.57	252	1240.64	7.75	84.3897	23.3649	108.605	0.262992	4.85686	28.741	23.7857	5.0501	0.120027	1.06883	-8.34519	-56.57
C. Bizo	2019-01-31	R	Inflowing canal	363.628	3010.24	-10.8407	0.786362	0.0471996	16.6604	-24.3461	11.2602	66.5	1.1825	1.37443	-23.6519	21.6	87.7	7.07	21.6	6.56	298	522.66	7.6	102.545	26.6377	150.11	0.211904	2.96564	27.9487	21.2115	1.61	0.146613	1.09992	-4.39142	-35.96
R. Sahamena	2019-01-31	R	inflowing river	295.116	2480.22	-9.28147	0.953851	0.0529319	18.0203	-24.6632	16.1865	20	4.76926	1.96514	-23.351	22	83.6	6.66	17.2	6.64	239	1555.65	8.07	84.7572	22.3938	133.491	0.197209	2.50207	20.9957	21.4231	5.9658	0.102931	0.808479	-5.4964	-40.43
C. Tetezampotsy Ambaibo	2019-01-31	R	Inflowing canal	368.072	3342.08	-10.3956	1.27292	0.0722324	17.6225	-24.0402	13.9541	64.5	1.97351	1.32451	-23.4089	22.3	80.5	6.41	24	6.71	300	900.75	9.61	134.474	50.5302	128.081	0.182564	7.6312	31.3505	36.5044	1.7525	0.218269	1.10763	-5.18371	-37.75
C. Ananas	2019-01-31	R	Inflowing canal	317.443	2768.48	-9.74782	1.12611	0.0611885	18.404	-25.1559	14.1332	29	3.88315	2.06269	-22.6973	22.1	79.4	6.33	21.2	6.73	257	786.7	6.83	82.5806	26.1118	127.284	0.199017	7.42862	21.5539	33.0509	5.50867	0.139855	0.993447	-4.891	-41.62
R. Sahabe 1	2019-01-31	R	inflowing river	535.788	7876.98	-15.9138	0.618953	0.0317381	19.5019	-24.1162	17.2271			2.56536	-24.1372	22.4	78.5	5.97	20.2	6.59	390	2144.86	7.04	132.001	49.9612	129.011	0.19969	6.93649	30.783	35.384	1.74159	0.220083	1.11102	-3.73724	-37.36
R. Sahabe 2	2019-01-31	R	inflowing river	369.918	6430.59	-15.4322	0.965707	0.0629941	15.3301	-25.5713	13.2488	37		2.46805	-23.9147	23.8	58.1	4.55	20.3	6.55	255	958.87	8.44	81.1049	24.772	117.454	0.235303	4.97036	32.0987	22.2797	4.47219	0.127249	0.906533	-6.56591	-59.78
R. Ranofotsy Andilanantoby	2019-01-31	R	inflowing river	525.236	1733.35	1.73857	0.924491			-24.9004	23.6297	85.5	1.08128	1.88307	-21.5192	23.2	85.4	6.67	43.7	6.81	486	2068.75	7.22	214.675	65.0725	203.975	0.231374	10.9172	44.6306	43.0632	2.57939	0.285407	1.43365	-3.62925	-37.47
C. Bevava	2019-01-31	R	Inflowing canal	422.487	1504.01	-8.63162	1.35551			-22.7875	16.3148	57	2.37808	4.16622	-19.293	24.2	87.6	6.7	37.1	6.91	389	212.52	5.84	207.293	50.5759	69.8481	0.170402	8.3506	32.2875	28.3106	1.37495	0.195497	1.09795	-1.83882	-28.4
C. Merimanjaka 3	2019-01-31	R	Inflowing canal	505.744	4130.92	-9.48321	0.872852			-21.8662	20.3986	67	1.30276	1.9321	-21.141	24.9	60.9	4.58	40.1	6.73	432	1361.53	6.36	142.61	63.0716	175.029	0.209165	8.82032	42.2606	54.6454	2.99884	0.297024	1.3716	-6.29433	-44.98
C. Merimanjaka 2	2019-01-31	R	Inflowing canal	479.261	2434.25	-4.18609	1.11943	0.109974	10.1636	-23.5591	12.1582	75.5	1.48269	1.95243	-20.4024	25	84.2	6.35	40.5	6.9	433	2168.74	6.53	160.834	59.4568	188.284	0.223653	9.89819	42.421	49.09	1.90416	0.267608	1.22677	-6.02681	-39.88
C. Mariane	2019-01-31	R	Inflowing canal	774.341	2160.83	-5.9937	1.38316	0.174982	7.90201	-27.0693	4.52404	47	2.94289	2.43236	-20.3646	24.6	90	6.85	75.6	6.92	732	551.56	8.03	276.085	99.9801	195.553	0.254835	14.0213	62.1536	117.137	1.39852	0.464711	1.43608	-2.41309	-29.73
C. Mandika Namana	2019-01-31	R	Inflowing canal	1031.92	3953.36	-11.1915	0.488093	0.0578362	8.43446	-27.7803	3.70395	12.5	3.90475	2.48609	-25.0716	25.4	80.1	6.01	77.9	6.94	964	1029.97	7.03	315.641	174.168	111.171	0.261265	16.4819	39.939	150.489	0.637742	0.701517	1.55204	-4.56412	-46.52
C. Andombon'Adala	2019-01-31	R	Inflowing canal	1131	3197.19	-9.81473	0.926105	0.115068	8.04832	-26.9994	4.05384	68.5	1.35198	2.51582	-24.124	24.4	71.7	5.36	109.5	6.9	1073	757.38	6.74	387.477	184.127	207.282	0.274197	14.2799	73.5445	166.181	1.17728	0.771541	1.8831	-3.68078	-39.71
R. Lohafasika	2019-01-31	R	inflowing river	1268.57	1631.87	-8.34269	1.07592	0.122685	8.76973	-23.9894	8.62551	287	0.374884	2.79605	-22.7326	28.9	80.5	5.69	136.5	7.3	1241	345.27	7.24	495.67	213.636	258.884	0.355326	22.9025	70.4916	169.597	1.11893	0.974449	1.96445	-4.67993	-37.35
R. Andrangorona	2019-02-02	R	inflowing river	1945	2110.58	-9.65694	1.97239	0.212409	9.2858	-28.0797	7.71273	62	3.18127	2.45751	-20.8965	22.8	87	6.88	142	7.06	1903	560.49	6.99	641.085	387.656	390.66	0.393542	49.4447	45.8625	323.322	0.517795	1.51665	1.93922		-35.21
R. Anony	2019-02-02	R	inflowing river	647.486	2438.63	-8.89668	5.77419	0.607249	9.50877	-21.1989	3.6445	117.5	4.91421	2.61973	-20.4126	25.3	67.6	4.89	62.9	6.99	600	270.26	6.49	251.963	102.557	204.242	0.261518	20.977	48.1804	72.074	0.859316	0.405887	1.27647	-3.93614	-31.63
C. Anony	2019-02-02	R	inflowing canal	585.651	7244.21	-13.2041	1.48981	0.139061	10.7134	-23.1624	7.1152	254.286	0.58588	5.29732	-22.2703	25.1	66.3	5.01	80.4	7.02	464	856.21	6.7	410.255	102.296	184.53	0.310111	74.7032	42.0171	70.4891	2.45063	0.448666	1.57537	-3.74071	-29.85
R. Sahamaloto	2019-02-02	R	inflowing river	585.373	2133.52	-8.80622	4.55305	0.518912	8.77423	-23.8949	3.85693	117.5	3.87494	2.71297	-21.8179	27.3	84.7	6.09	46.7	7.07	546	357.97	10.7	196.05	64.9528	203.875	0.268978	7.64845	51.5777	42.7071	4.53374	0.311692	1.13926	-2.92193	-33.42
R. Ivakaka	2019-02-02	R	inflowing river	385.059	3342.98	-11.1561	1.54177	0.128899	11.9611	-23.9996	6.22667	46.6667	3.30379	2.50222	-22.9356	28.5	77.7	5.47	40	7.11	330	1571.65	6.45	130.948	41.1547	197.528	0.40966	5.46603	31.5442	38.237	9.03557	0.211026	1.0857	-3.25388	-33.1
C. Ambomandroso	2019-02-07	R	inflowing canal	506.246	3913.66	-11.6887	1.21305	0.112716	10.762	-23.7902	7.07155	30	4.04351	1.81828	-22.685	24.2	79.6	6.08	39.7	6.44	431	2715.25	21.39	143.792	60.6123	153.572	0.199531	4.40434	40.7669	48.4642	2.21208	0.289391	1.37545	-2.15208	-33.25
C. Ampasikely	2019-02-07	R	inflowing canal	631.118	18183.8	-12.8525	0.607265	0.0639579	9.49477	-25.4675	7.19862	18	3.37369	4.15568	-23.115	24.3	77.7	6.03	1.5	6.49	331	10306.4	5.31	143.28	32.7049	66.2484	0.209808	0.269824	18.3285	33.8239	11.6386	0.189143	1.24259	0.0672752	-20.72
C. Tetezampotsy	2019-02-07	R	inflowing canal	417.922	1912.16	-8.46675	2.29053	0.215323	10.6377	-24.1182	4.36716	13.5	16.9669	1.19798	-22.5585	28.9	80.8	5.68	37.4	6.57	383	1209.54	10.64	139.21	45.6662	133.816	0.152665	5.59053	33.1709	37.8367	0.768693	0.221826	1.1809	-2.89428	-31.59
C. Bizo	2019-02-07	R	inflowing canal	402.814	4339.02	-11.1947	0.418482	0.0384204	10.8922	-25.3541	8.15311	9	4.6498	1.15149	-22.3614	27	65.5	4.74	29.6	6.33	331	5408.94	8.63	112.884	35.1109	175.384	0.210114	1.48213	29.9936	30.6319	2.83526	0.202784	1.22382	-2.67743	-31.77
R. Sahamena	2019-02-07	R	inflowing river	379.833	2544.39	-9.5929	0.488099	0.0423695	11.5201	-24.6192	7.01529	14.5	3.3662	2.14209	-23.9574	26.1	81.8	6.04	21.8	6.5	332	1270.14	8.63	86.3112	26.198	147.056	0.200304	1.06623	19.6177	28.6812	14.898	0.126087	0.861737	-2.96001	-37.81
C. Tetezampotsy Ambaibo	2019-02-07	R	inflowing canal	327.571	1842.64	-6.53561	0.505134	0.050566	9.98959	-24.8348	8.38689	51	0.990458	0.948742	-24.3912	29.8	78.7	5.4	24.5	6.72	295	554.37	15.3	113.131	26.4056	164.555	0.160955	4.10527	26.1564	23.9342	1.70885	0.123768	0.927853	-3.91834	-33.27
C. Ananas	2019-02-07	R	inflowing canal	365.596	1866.12	-8.35494	1.1614	0.106064	10.95	-24.3454	7.33345	44.5	2.60989	1.80316	-23.9035	27.1	82.5	5.99	30.4	6.59	329	851.4	7.42	106.187	34.7039	160.15	0.198336	8.99678	21.6741	47.6628	11.6112	0.199453	0.90583	-3.6998	-35.27
R. Sahabe	2019-02-07	R	inflowing river	458.403	6379.34	-12.388	0.968886	0.0899342	10.7733	-24.6083	8.59156	24.5	3.95464	2.48545	-23.7461	26.5	81.3	6.19	29.9	6.6	356	1165.32	5.94	109.505	43.7431	151.748	0.271049	3.95554	24.5676	47.5177	6.53225	0.235614	1.01453	-4.67569	-36.79
R. Ranofotsy Andilanantoby	2019-02-07	R	inflowing river	642.943	2234.42	-10.5859	0.952162	0.0869855	10.9462	-24.9806	7.78063	44	2.16401	1.63561	-21.1972	34.5	78	4.96	71.9	7.04	611	4907.84	6.07	239.791	93.1531	213.54	0.219973	6.14511	50.9465	63.4768	1.54101	0.42158	1.57809	-3.27174	-30.6
C. Bevava	2019-02-07	R	inflowing canal	444.456	1270.22	-0.622274	2.90771	0.348958	8.3193	-18.9893	5.14485	26.6667	10.9039	3.87532	-19.4911	28.5	80.1	5.64	39.2	6.85	419	1588.69	6.16	199.471	48.8595	81.3673	0.180778	7.26283	29.2898	30.8928	3.96928	0.206735	1.38896	-2.09879	-31.59
C. Merimanjaka 2	2019-02-07	R	inflowing canal	525.99	1513.89	-5.50093	1.25949	0.11484	10.9674	-23.7124	8.41793	98	1.28519	1.77509	-20.0748	34.4	82.1	5.24	56.1	7.11	502	223.25	5.41	171.904	66.7311	219.689	0.242604	10.658	42.3862	57.2073	2.79641	0.304537	1.25524	-4.02529	-36.03
C. Mariane	2019-02-07	R	inflowing canal	1269.33	1241.54	-7.33043	3.21297	0.417218	7.70095	-19.0776	5.86485	28	11.4749	2.38396	-21.072	26.7	94.9	6.82	82.7	6.63	1247	496.04	6.63	282.662	108.319	206.618	0.255409	14.5285	63.0897	128.12	0.395328	0.493976	1.00848	-2.25848	-27.51
C. Mandika Namana	2019-02-07	R	inflowing canal	861.829	5460.06	-12.2091	0.786403	0.0960246	8.1896	-26.4166	10.7721	25	3.14561	3.99282	-24.9021	31	74.5	5.02	131.5	6.41	787	778.03	6.07	409.114	216.332	147.041	0.256094	8.77335	39.0435	197.092	1.067	0.938544	1.7037	-1.07161	-19.28
R. Andrangorona	2019-02-08	R	inflowing river	1718.82	1854.48	-9.3012	1.78442	0.221416	8.06478	-22.1509	7.10713	98	1.82083	2.73787	-20.6739	25.8	82.2	6.17	170.1	6.83	1685	224.06	5.89	572.809	333.086	378.163	0.53382	39.5683	46.2574	277.434	1.24014	1.29924	1.8982	-4.15813	-33.21
R. Anony	2019-02-08	R	inflowing river	668.719	1728.51	-7.94839	4.15425	0.47577	8.73163	-23.464	5.63399	64	6.49101	2.47326	-20.5682	29.3	86	6.01	74.9	6.97	637	375.16	5.19	269.572	123.662	210.715	0.304618	24.2479	45.208	83.9745	3.01237	0.473925	1.11044	-1.65553	-19.95
C. Anony	2019-02-08	R	inflowing canal	842.358	6836.57	-10.6083	1.05608	0.125283	8.42958	-23.3536	11.4861	95	1.11167	5.26886	-24.6938	29.6	76.6	5.3	117.4	6.92	745	581.88	5.33	538.901	154.091	276.336	0.348176	104.861	46.4435	97.5762	1.13318	0.620819	1.67656	-0.439962	-29.08
R. Ivakaka	2019-02-08	R	inflowing river	473.311	4545.45	-11.6125	3.31588	0.39656	8.36162	-24.7935	7.39359	65.5	5.06242	3.01709	-23.6745	33.6	70	4.53	44.8	7.02	412	242.68	14.13	157.463	50.0475	231.184	0.380625	11.5153	33.8904	47.8274	7.54668	0.262964	1.0753	-4.16111	-29.98
R. Sahamaloto	2019-02-11	R	inflowing river	454.631	2329.85	-9.32153	2.26781	0.227451	9.97057	-23.9998	8.08133	122.667	1.84876	2.97097	-23.0878	23.4	79.4	6.16	33.5	7.01	405	1124.49	6.4	168.123	42.9947	175.731	0.249865	11.4698	52.551	30.4681	4.4889	0.236661	1.49134	-3.23778	-25.79
C. Ambomandroso	2019-02-13	R	inflowing canal	491.306	4029.71	-11.7466	0.772931	0.0811009	9.54985	-25.6832	4.24667	28	2.76047	1.76543	-27.0006	22.9	79.9	6.3	35.4	6.3	412	3322.59	13.2	130.264	51.8885	143.681	0.233849	3.96122	36.3458	41.7021	2.53566	0.253175	1.32259	-4.09945	-30.22
C. Ampasikely	2019-02-13	R	inflowing canal	484.53	8876.48	-15.2084	2.67649	0.263589	10.154	-22.6106	8.49941	14	19.1178	8.11122	-23.5321	24.1	42.7	3.21	27.3	6.23	330	3892.71	5.61	166.333	33.887	67.572	0.414328	1.75572	16.8001	35.5243	14.2926	0.154618	0.936346	1.25169	-2.91
C. Tetezampotsy	2019-02-13	R	inflowing canal	524.761	4329.18	-11.9458	0.75809	0.0795261	9.53259	-26.1768	7.11035	19.5	3.88764	2.49422	-24.456	25.5	77.1	5.77	41.6	6.43	449	723.67	9.54	168.189	67.7346	133.205	0.245112	6.53667	30.2666	47.1467	2.50699	0.2964	1.39413	-1.22548	-17.97
C. Bizo	2019-02-13	R	inflowing canal	456.113	9025.2	-15.0489	1.03687	0.126406	8.20267	-26.0331	12.3232	21	4.93748	2.29872	-24.8857	25.1	57.1	4.31	24.3	6.25	307	2288.19	8.99	88.0876	36.9552	114.269	0.207732	0.26938	23.9207	29.5312	3.52439	0.193501	1.09847	-2.21671	-16.67
R. Sahamena	2019-02-13	R	inflowing river	338.798	2914.97	-11.1266	0.684428	0.061448	11.1383	-24.9748	20.8496	24	2.85178	1.93794	-23.7728	24.1	84.6	6.54	20	6.42	281	1382.82	9.23	90.3751	26.4384	141.221	0.192145	2.86816	20.7183	28.9107	8.72139	0.12677	0.87694	-4.29068	-33.99
C. Tetezampotsy Ambaibo	2019-02-13	R	inflowing canal	459.625	3524.02	-10.3999	1.27722	0.140869	9.06677	-24.5601	17.5157	31.5	4.05468	1.78068	-24.0679	25.7	79.3	5.93	27.1	6.55	397	735.88	11	131.921	30.3809	142.957	0.262694	5.03105	33.8909	26.4162	2.75366	0.124024	0.876299	-1.46913	-26.56
C. Ananas	2019-02-13	R	inflowing canal	347.904	3548.16	-10.3552	0.839841	0.0771918	10.8799	-24.984	22.8624	24	3.49934	2.17384	-24.3688	24.5	79.3	6.05	23.1	6.44	282	747.39	9.81	91.6558	29.0254	131.129	0.210335	5.94654	22.4084	36.3778	6.8586	0.158548	0.885615	-3.68361	-27.31
R. Sahabe 1	2019-02-13	R	inflowing river	315.096	3164.59	-10.8268	1.05157	0.105186	9.99721	-25.0653	19.1666	31.5	3.33832	2.19544	-24.5433	24.4	85.2	6.51	23.2	6.51	254	623.08	9.47	93.6432	29.1067	130.851	0.248777	4.87384	22.0511	35.5997	5.22862	0.156674	0.904813	-3.32374	-26.33
R. Ranofotsy Andilanantoby	2019-02-13	R	inflowing river	572.61	1777.43	-9.34795	1.74596	0.182115	9.5871	-23.502	16.4816	93	1.87737	1.73965	-22.0332	28.4	88.9	6.32	56.5	6.9	540	2037.94	5.33	225.157	81.6877	200.782	0.226658	9.38923	42.5586	54.6658	1.9786	0.347902	1.35283	-4.06194	-28.12
C. Bevava	2019-02-13	R	inflowing canal	451.722	1597.92	-1.02171	2.56262	0.323528	7.92085	-21.2562	10.5005	26	9.85622	3.99066	-19.9165	27	86.6	6.44	39.1	6.67	420	1323.54	6.53	196.543	53.4446	81.1687	0.202023	8.66209	29.795	31.9036	3.32024	0.230094	0.949723	-2.56039	-29.14
C. Merimanjaka 3	2019-02-13	R	inflowing canal	743.076	4260.55	-10.5818	1.41187	0.166494	8.48	-26.1589	19.8001	94.5	1.49404	2.14374	-22.6825	29.7	71.6	4.89	66.8	6.49	679	1213.36	5.55	182.339	116.339	189.199	0.224794	5.82658	41.7006	95.3731	1.43291	0.527278	1.55612	-2.78159	-25.47
C. Merimanjaka 2	2019-02-13	R	inflowing canal	484.543	1166	-6.74499	1.07895	0.126424	8.5344	-23.1216	22.9497	134	0.805188	1.47491	-20.9738	31.3	88.5	5.98	50.6	7.2	463	124.13	5.22	167.277	65.2998	214.063	0.231369	9.07833	40.5382	58.4524	2.81087	0.292006	1.26286	-4.36598	-33.55
C. Mariane	2019-02-13	R	inflowing canal	808.022	2104.39	-7.08649	1.39048	0.209548	6.63561	-25.6282	18.9784	26.5	5.24709	2.0557	-21.9139	26	94.5	7.02	79.7	6.73	769	431.42	7.33	277.466	97.2853	202.203	0.194137	13.408	61.7923	110.485	0.048966	0.455581	1.44406	-2.30906	-24.01
C. Mandika Namana	2019-02-13	R	inflowing canal	1298.17	5346.7	-11.9092	0.332063	0.0471435	7.04366	-27.101	33.4181	9	3.68959	3.48838	-25.7701	29.1	75.7	5.34	126.2	6.96	1221	908.33	5.39	392.089	214.654	154.981	0.265628	3.60772	45.4319	192.121	0.643772	0.907157	1.7246	-0.145163	-11.75
R. Anony	2019-02-15	R	inflowing river	640.034	1856.16	-7.88131	1.38169	0.163458	8.45289	-23.8524	27.1508	109.5	1.26182	2.27649	-19.425	28.2	89.8	6.43	68.8	7.05	604	144.48	6.14	264.69	108.318	203.972	3.26675	25.7859	45.6452	74.8323	7.00379	0.434711	1.17193	-2.3759	-26.44
C. Anony	2019-02-15	R	inflowing canal	753.004	7327.29	-11.4702	2.36256	0.305245	7.73989	-25.3732	9.97637	86	2.74716	5.4899	-22.0855	28.1	75.2	5.37	83.8	6.96	644	552.47	6.19	388.31	117.956	207.121	0.55929	67.7029	34.3642	81.0183	3.68285	0.518284	1.18081	-0.308688	-7.83
R. Sahamaloto	2019-02-15	R	inflowing river	579.115	1840.57	-8.00836	1.7798	0.158654	11.2181	-24.4981	25.0103	133	1.33819	2.61935	-20.9102	28.4	85.8	6.05	53.3	7.09	546	1485.45	6.1	223.727	74.3245	219.59	0.322138	11.6124	55.8792	48.7486	6.25498	0.355364	1.08262	-4.20416	-27.5
R. Ivakaka	2019-02-15	R	inflowing river	581.966	5097.67	-12.575	2.13589	0.182496	11.7037	-25.9035	8.73334	37.5	5.6957	2.76124	-22.8348	30	77.2	5.3	51.6	7.09	508	555.59	7.55	192.036	66.4804	258.341	0.41105	19.3912	36.6847	63.5379	6.39729	0.354321	1.04742	-2.92011	-25.76
C. Ambomandroso	2019-02-19	R	inflowing canal	549.198	4179.05	-11.9357	0.964821	0.0993944	9.68953	-24.8349	3.73935	39	2.4739	1.90885	-23.1303	22.9	81.7	6.4	37.5	6.41	465	2686.1	11.4	138.514	58.7215	144.246	0.228399	2.60004	33.551	46.869	2.64304	0.282659	1.37801	-2.3889	-27.09
C. Ampasikely	2019-02-19	R	inflowing canal	376.339	1657.7	-15.7908	1.87307	0.189021	9.90932	-23.7452	5.71812	11	17.0279	7.28042	-22.9126	23.4	82.6	6.27	35.2	6.55	338	7708.07	5.09	144.415	29.3469	60.7146	0.303937	-1.4015	8.77619	33.1387	12.4889	0.152769	1.06825	1.76514	-4.7
C. Tetezampotsy	2019-02-19	R	inflowing canal	377.842	1676.09	-7.95957	0.613662	0.0461108	13.3084	-25.2271	10.86	10	6.13662	1.34496	-22.2949	24.8	82.6	6.27	35.2	6.55	341	853.54	10.11	163.048	52.4556	134.385	0.243036	4.7326	29.005	42.2721	1.71306	0.245402	1.2462	-1.21951	-24.66
C. Bizo	2019-02-19	R	inflowing canal	320.688	4813.92	-12.1877	0.708849	0.0531336	13.3409	-26.5065	4.53432	16.5	4.29605	1.50972	-24.0336	24	69.4	5.3	27	6.25	231	1616.67	7.32	97.5895	37.417	148.203	0.19364	-0.185165	24.5749	30.9511	2.09026	0.211777	1.19587	-3.69043	-23.01
R. Sahamena	2019-02-19	R	inflowing river	241.609	2502.03	-10.0239	0.62035	0.0579447	10.7242	-24.5449	4.16489	22	2.81977	1.926	-23.8132	23.8	84.5	6.51	20.8	6.55	189	1401.34	8.56	88.1289	26.6914	142.621	0.203858	1.06961	18.1755	28.2997	13.7205	0.131688	0.92602	-3.98949	-33.45
C. Tetezampotsy Ambaibo	2019-02-19	R	inflowing canal	212.717	2516.51	-10.5636						130.5	0	1.16394	-23.5062	24.7	81.7	6.19	24.2	6.63	163	930.81	8.66	107.107	23.4653	145.517	0.195561	6.5116	28.5128	21.3269	1.42757	0.106005	0.949311	-1.78439	-27.23
C. Ananas	2019-02-19	R	inflowing canal	271.791	2164.84	-8.43422	0.613955	0.0610991	10.0907	-25.1219	5.28815	29	2.11709	2.05278	-24.0783	24.5	82.6	6.32	27.8	6.67	227	847.45	7.4	101.5	33.4861	149.009	0.23747	7.98907	19.8948	45.8733	11.1955	0.197447	0.881614	-1.97008	-29.68
R. Sahabe 1	2019-02-19	R	inflowing river	364.346	5817.49	-11.7924	0.752958	0.0867722	8.67741	-25.3654	4.69798	15.5	4.85779	2.38955	-24.3047	26.3	55.9	4.13	33.2	6.57	269	1321.6	6.24	112.125	42.5942	140.307	0.244649	3.84719	19.8616	47.7302	5.53555	0.239299	0.969212	-2.81938	-27.69
R. Ranofotsy Andilanantoby	2019-02-19	R	inflowing river	619.133	2185.82	-10.3725	1.42991	0.160396	8.91486	-26.4191	4.63172	12.5		1.51073	-21.1005	29.7	83.3	5.73	69.8	6.99	582	5422.87	5.63	234.555	106.916	206.709	0.250183	4.08589	44.4106	75.7212	1.17978	0.510339	1.63816	-2.86371	-24.99
C. Bevava	2019-02-19	R	inflowing canal	372.14	970.291	0.134934	3.03201	0.361197	8.39435	-19.9153	5.47714	16	18.9501	3.89996	-19.3776	27.4	92.8	6.69	39.4	6.91	349	1156.14	5.95	211.298	55.7937	84.5246	0.327981	5.88805	30.4749	36.8322	1.70523	0.240758	1.10673	-2.52529	-27.65
C. Merimanjaka 3	2019-02-19	R	inflowing canal	778.411	6579.91	-12.1593	1.37033	0.190657	7.18743	-26.7647	7.49532	43.5	3.15019	2.14945	-21.6249	31.3	72.7	4.93	88.9	6.83	689	1960.25	5.32	191.439	148.52	195.346	0.262833	2.6847	34.5891	118.088	1.24081	0.693712	1.74124	-1.98855	-25.03
C. Merimanjaka 2	2019-02-19	R	inflowing canal	488.313	1148.18	-6.54273	1.08715	0.138937	7.82475	-24.4947	17.4145	82	1.32579	2.14094	-21.0286	34.8	80.1	5.08	60.4	7.22	469	225.73	4.49	198.825	116.209	215.511	0.403488	5.34468	41.7569	98.2801	0.620483	0.536426	1.70457	-3.10012	-31.7
C. Mariane	2019-02-19	R	inflowing canal	685.687	2098.18	-6.5844	1.00942	0.15869	6.36096	-28.3236	10.2585	29.5	3.42176	3.82857	-23.509	26.8	94.2	6.84	74.8	6.76	647	265.19	6.85	268.037	98.9846	185.615	0.226123	11.3378	62.1037	112.184	0.899497	0.453184	1.18094	-2.7519	-28.38
C. Mandika Namana	2019-02-19	R	inflowing canal	1312.97	6155.62	-12.3392	0.625761	0.094524	6.62013	-26.7717	2.93685	29	2.1578	2.52293	-23.1626	29.5	63.83	4.44	136.9	6.81	1226	756.59	5.39	417	230.865	177.748	0.235525	7.477	37.2496	210.996	0.83953	0.973523	1.80555	-0.105951	-12.58
R. Ambadrika	2019-02-19	R	inflowing river	1127.71	3352.41	-8.1659	2.70969	0.361997	7.4854	-20.5073	7.10675	669.333	0.404834	2.18579	-23.465	33	76.3	4.99	143.2	7.19	1083	437.63	5.27	491.902	202.747	478.898	0.99834	43.8598	46.1928	173.025	0.289384	0.764189	2.0118	-1.34411	-30.27
R. Andrangorona	2019-02-20	R	inflowing river	2011.95	1832.62	-9.01255	2.47812	0.32978	7.51445	-21.1619	8.23934	156	1.58854	4.93515	-15.1784	23.8	87.2	6.75	198.8	7.31	1980	539.79	6.88	657.733	396.286	435.829	0.59864	35.1992	46.7049	340.764	0.245691	1.56928	1.86846	-3.54082	-30.79
R. Anony	2019-02-20	R	inflowing river	663.166	1559.71	-8.00124	1.64318	0.184203	8.9205	-23.3549	6.01432	36.5	4.50187	1.89437	-18.2936	28.3	91.7	6.55	52.2	7.26	633	227.47	6.02	272.823	136.124	223.328	0.286025	27.2504	42.863	95.4059	3.42693	0.533623	1.19326	-3.00365	-27.61
C. Anony	2019-02-20	R	inflowing canal	764.416	5855.04	-9.84802	2.25229	0.311859	7.22214	-26.5844	4.16984	77	2.92505	4.80062	-22.0768	27.1	91.8	6.68	103.1	7.05	672	440.54	6.19	456.986	149.093	294.111	0.329542	82.9647	33.4171	94.8482	3.26937	0.602995	1.359	-1.03212	-14.53
R. Sahamaloto	2019-02-20	R	inflowing river	506.771	1612.78	-8.00734	1.26856	0.12679	10.0259	-23.8778	5.25375	137	0.925957	2.53843	-20.7761	28.6	88	6.2	56.1	7.18	476	1437.28	6.52	235.577	80.3877	231.497	0.16667	11.9829	53.6307	53.0106	4.38565	0.374663	1.17715	-4.13227	-29.89
R. Ivakaka	2019-02-20	R	inflowing river	441.433	5621.98	-11.3838	3.95125	0.433123	9.1261	-23.0369	3.80464	162.5	2.43154	2.86198	-23.8604	32	80.5	5.38	49.7	7.07	366	819.59	7.12	176.521	57.2303	270.252	0.243964	15.2223	33.8681	52.8777	2.00283	0.30243	1.26453	-4.12943	-26.97
R. Sahamaloto	2018-07-05	D	inflowing river			-5.356	1.00038	0.105494	9.48286	-27.2263	6.88183	8.94737	11.1807	2.06803	-23.5769		63.2	8.7	39.4	7.3	411	7.37	14.68	218.799	69.3967	212.584	0.312403	8.86385	51.4007	49.0313	0.201663	0.364729	1.15117	-0.542112	-23.73
R. Sahamaloto	2018-07-26	D	inflowing river			-3.382	1.57258	0.146386	10.7426	-26.3569	8.14194	8.42105	18.6744	2.97596	-26.9981		106.6	9.39	38.5	7.45	632	18.23	14.6	226.744	70.7033	214.925	0.165874	10.4569	50.961	56.2447	0.230081	0.421982	1.21323	-2.38621	-21.3
R. Sahamaloto	2018-08-11	D	inflowing river			-2.576	1.30524	0.102489	12.7354	-26.9112	8.66104	7.61905	17.1313	1.56627	-23.3978		107.5	9.44	40.5	7.43	414	41.43	15.37	236.555	72.7355	220.171	0.199028	7.93818	53.6867	52.7244	1.76647	0.36081	1.20131	-2.57587	-22.54
R. Sahamaloto	2018-08-23	D	inflowing river			-3.633	1.44913	0.101351	14.2981	-26.6925	7.97225	7.89474	18.3557	1.4867	-23.4904		107	9.05	41.1	7.18	387	34.51	14.88	253.668	76.3082	234.306	0.370705	11.1078	55.5216	62.5473	0.387805	0.389656	1.00678	-2.9758	-16.44
R. Sahamaloto	2018-09-09	D	inflowing river			-2.917	1.35172	0.120304	11.2359	-26.1768	10.6903	23.1579	5.83699	3.39223	-27.0655		104.4	8.78	39.6	7.27	582	28.59	14.42	247.291	71.7876	224.549	0.253804	9.41869	55.1347	65.8848	0.43582	0.383357	1.15091	-2.6533	-19.91
R. Sahamaloto	2018-09-23	D	inflowing river			-2.856	1.10947	0.256049	16.0495	-26.2281	10.0306	3.68421	30.1142	2.55794	-24.8196		90.73	8.26	40.5	7.76	466	41.43	12.81	249.44	71.7825	223.26	0.165624	7.21218	52.595	50.7848	1.29997	0.354835	1.28012	-2.70842	-20.15
R. Sahamaloto	2018-10-06	D	inflowing river			-4.757	2.21469	0.171918	12.8823	-25.9825	9.18818	12.1053	18.2952	1.90538	-23.6683		63.24	6.9	41.3	7.64	486	40.81	13.54	282.994	79.9332	232.898	0.548629	10.2387	60.5722	74.2833	0.689315	0.417326	1.25332	-2.46832	-17.64
R. Sahamaloto	2018-10-23	D	inflowing river			-2.032	1.1635	0.127185	9.14808	-25.2531	8.64096	8.42105	13.8165	2.01586	-24.445		85.1	6.57	49		468	47.42	12.97	258.747	73.937	228.431	0.235677	7.79811	56.7107	55.3954	0.874459	0.383864	1.30405	-2.60556	-19.63
R. Sahamaloto	2018-11-07	R	inflowing river			-1.064	1.12015	0.161268	6.94592	-26.2711	7.17301	8.94737	12.5193	3.17741	-27.1107		103.9	8.4	42.3	7.4	489	62.29	13.26	307.646	84.266	234.855	0.603177	24.2086	67.5204	87.8582	0.838014	0.654415	0.922361	-1.61177	-14.77
R. Sahamaloto	2018-11-21	R	inflowing river			-7.208	1.45848	0.145782	10.0045	-24.8774	9.72837	20	7.29238	2.09828	-23.4801		104.2	8.36	40.2		1909	33.58	12.67	294.562	92.2647	211.883	0.391125	19.6707	71.1539	166.653	1.04783	0.742063	1.0519	0.0886872	-12.08
R. Sahamaloto	2018-12-06	R	inflowing river			-5.33	1.88349	0.193217	9.74803	-24.9274	10.5658	28	6.72674	3.33195	-25.8327		92.4	6.43	70.2	6.24	630	46.76	12.29	278.469	74.7501	203.753	0.202428	20.5089	70.4327	60.5138	1.79053	0.41023	1.04718	-0.567259	-13.79
R. Sahamaloto	2018-12-23	R	inflowing river			-5.115	1.54884	0.190906	8.1131	-24.6564	8.61184	70	2.21263	2.89025	-22.3638		10.3	0.76	67.9		741	131.33	32	300.859	72.0928	203.369	0.191596	21.0245	85.5365	52.9477	0.0485554	0.365935	1.1067	0.285315	-10.13
R. Sahamaloto	2019-01-06	R	inflowing river			-7.276	2.88498	0.348733	8.27274	-23.5984	7.69915	181.579	1.58883	3.15636	-25.2233		12.5	0.93	41.5	8.83	358	18	12.74	202.517	41.1332	172.309	1.06387	22.1142	77.4571	46.1345	1.88262	0.220862	0.968325	-2.93091	-21.37
R. Ranofotsy	2018-07-01	D	inflowing river			-5.63	1.23425	0.149018	8.2826	-25.6416	6.18501	215.789	0.571971	0.980783	-20.8223		112.7	9.66	0.8	7.05	881	657.41	22.42	327.531	115.542	366.412	0.919849	6.6862	37.5545	88.1578	1.8527	0.538946	1.66567	-3.82937	-35.54
R. Ranofotsy	2018-07-20	D	inflowing river			-6.21	2.38393	0.214339	11.1222	-26.0341	6.35068	6.84211	34.842	1.41349	-21.4371		107.2	9.79	46	7.23	558	129.35	16.61	335.725	95.9948	260.846	0.334133	6.82013	35.1809	71.6386	0.553576	0.473034	1.36332	-4.00852	-31.24
R. Ranofotsy	2018-08-23	D	inflowing river				0.506961	0.0579381	8.77401	-26.4172	9.44959	5.26316	9.63226
R. Ranofotsy	2018-09-06	D	inflowing river			-13.323	1.30126	0.089279	14.5752	-27.2012	7.78349			1.68618	-20.5902		110.3	9.5	1.87	7.36	1008		25.54	375.345	153.527	255.652	0.202123	2.88557	44.948	118.306	6.52747	0.812652	4.34305	-2.48566	-16.67
R. Ranofotsy	2018-11-05	R	inflowing river			-12.354	1.30888	0.119692	10.9396	-24.5463	9.66765	76.8	1.70427	3.96127	-26.4731		95.52	8.98	47.3	7.39	957	576.49	15.86	439.632	82.057	212.552	0.20485	89.1697	55.7385	117.746	0.0253591	0.759589	1.4249	-0.207675	-11.66
R. Ranofotsy	2018-11-20	R	inflowing river			-11.091	1.35046	0.165027	8.18258	-23.4242	4.59589	148.947	0.906669	2.34817	-23.1851		102.4	8.32	57.4	7.26	542	383.05	8.79	323.481	81.0995	237.307	0.333031	19.3046	79.1234	59.0339	1.65913	0.381789	1.44753	-1.72742	-17.1
R. Ranofotsy	2018-12-06	R	inflowing river			-10.912	2.45825	0.308469	7.95949	-23.5868	6.90192	266.421	0.922694	2.10507	-23.2906							307.04	8.29	308.716	43.2521	226.315	1.52605	24.7993	76.1545	60.5914	4.18084	0.233717	0.817433	-0.51384	-12.84
R. Ranofotsy	2018-12-23	R	inflowing river			-12.527		2.01341	8.86018	-23.9493	3.75316	145.263		2.35211	-22.6869		80.1	6.3	44		379	261.69	13.31	290.721	43.5681	228.42	0.226652	27.2502	67.0359	42.342	2.02523	0.227421	0.949288	-1.02857	-15.04
R. Ranofotsy	2019-01-24	R	inflowing river			-9.24734	1.14897	0.117346	9.79128	-25.6184	5.14023	36.6667	3.13355	2.37173	-23.3004	23.9	63.2	5.19	49.7	7.47	556	1265.1	21.13	305.989	95.0381	233.724	2.04094	11.5604	43.0797	74.8667	1.29983	0.440101	1.51108	-3.62726	-28.4593
R. Ranofotsy	2019-02-06	R	inflowing river			-10.2715	0.842541	0.0894521	9.4189	-27.5299	1.68257	82.6667	1.0192	2.56287	-23.264	24.5	79.4	6.06	63	7.51	652	654	7.08	267.463	81.1574	210.325	1.15947	10.8857	71.0346	59.4752	2.35913	0.402113	1.45145	-4.59917	-31.81
R. Ranofotsy	2019-02-20	R	inflowing river			-9.41132	0.977127	0.10439	9.36036	-27.0568	2.92157	3.68421		2.63971	-23.6145	25	77.2	5.92	64	7.57	828	396.4	6.86	310.765	126.986	231.604	2.15655	0.460554	52.0704	102.791	1.39853	0.659468	2.26483	-2.7214	-23.0394
R. Ranofotsy	2019-03-07	R	inflowing river			-9.74029	1.17943	0.131456	8.97203	-25.3525	5.10679	73.3333	1.60831	2.80277	-23.4957	24.2	76.8	5.02	63.9	7.54	634	448.3	6.94	277.034	117.237	244.125	1.02739	6.39622	38.6199	88.1334	0.420385	0.537207	1.21104	-3.84176	-28.2205
R. Ranofotsy	2019-03-23	R	inflowing river			-14.4786	1.7614	0.184936	9.52436	-25.2646	5.51811	113.333	1.55417	1.63158	-24.1685	24.2	80.4	62.1	64.2	7.5	556	13.7	0.32	300.804	91.3519	223.821	2.56756	18.6959	62.3076	70.3984	2.4197	0.453052	1.59901	-4.4192	-29.3464
R. Ranofotsy	2019-04-04	R	inflowing river			-9.72922	2.61243	0.302805	8.62744	-25.1554	6.56868	316.667	0.824978	1.71836	-24.0788	26.6	80.5	6.16	42.2	7.51	613	1941.9	7.14	295.832	116.115	253.969	6.71123	16.0284	41.8042	91.2876	1.54936	0.573439	2.03259	-4.13282	-28.108
R. Ranofotsy	2019-04-24	R	inflowing river			-11.7533	2.94168	0.384592	7.64882	-24.6803	5.35196	487.368	0.603584	2.49324	-23.9136	23.9	61.6	4.75	47.7	7.31	556	4006.7	7.16	269.383	99.392	245.474	1.51757	2.68391	38.8484	75.8477	0.575152	0.475469	1.42725	-3.11403	-26.7752
R. Ranofotsy	2019-05-06	D	inflowing river			-15.1969	0.477212	0.0562887	8.47794	-26.2512	6.38227			3.2036	-22.7469	26.2	80.6	6.24	65.7	7.24	665	7.5	18.36	290.668	98.6093	240.451	5.70453	11.2415	40.2751	77.3405	0.527269	0.499308	1.56784	-3.97316	-29.4775
R. Ranofotsy	2019-05-24	D	inflowing river			-14.5732	2.20559	0.309555	7.12505	-24.8299	4.22541	212.667	1.03711	2.75416	-23.5666	25.3	62.4	3.73	41.3	7.3	737	38.3	20.71	305.075	126.295	226.805	2.46691	2.94379	44.8949	97.9407	1.3964	0.653285	2.41964	-3.67499	-25.3285
R. Ranofotsy	2019-06-10	D	inflowing river			-9.85799	1.2827	0.156084	8.21804	-25.6649	7.15424	124	1.03444	1.8732	-25.6993	28.4	70.8	5.14	68.5	6.76	549	0	16.73	297.481	99.3752	244.354	4.44803	9.42715	40.4071	77.0468	0.281683	0.494264	1.62592	-3.8858	-27.4618
R. Ranofotsy	2019-06-28	D	inflowing river			-10.4767	1.29841	0.103192	12.5825	-26.3341	4.91127	14	9.27438	1.89343	-26.2404	22.3	54.8	4.16	49.4	6.87	525	8.7	11.91	267.655	115.122	236.929	6.31167	14.7413	41.3489	74.2928	0.585749	0.762714	1.45287	-4.2155	-29.5034
R. Ranofotsy	2019-07-07	D	inflowing river			-9.74532	0.449968	0.0685235	6.56662	-26.982	3.12621	24	1.87487	3.1397	-23.3969						540	0	10.98	307.684	96.8499	232.608	2.53874	19.2393	43.5465	78.4876	1.62834	0.50852	1.46477	-4.31294	-29.1042
R. Anony	2019-03-10	R	inflowing river			-8.88517	1.99268	0.20314	9.80938	-24.7227	2.92562	314.737	0.633125	1.8092	-23.5508	25.1	62.2	4.7	36.5	7.38	421	13.3	7.07	241.407	92.1239	208.106	0.248192	21.8529	46.7971	63.7928	3.02098	0.366563	1.70295	-2.869	-24.8175
R. Anony	2019-03-29	R	inflowing river			-1.49399	1.3137	0.141538	9.28158	-25.5244	5.46239	146.522	0.896589	2.05264	-24.5164	24.1	57.3	4.37	52.8	7.44		14.2	6.61	295.786	135.39	226.226	0.308676	21.916	40.4819	99.0548	1.10506	0.525267	1.40668	-4.0179	-26.7956
R. Anony	2019-04-06	R	inflowing river			-8.49082								1.82833	-24.456	26.3	50.3	4.73	45.6	7.82	672	12.2	6.63	284.82	136.227	228.593	0.281254	21.6492	40.4006	99.2576	1.54702	0.534283	1.43065	-3.71846	-26.1348
R. Anony	2019-05-10	D	inflowing river				2.23988	0.25429	8.80837	-26.049	9.12266	43.1579	5.18996	3.14604	-22.8187	26.7	58.4	5.1	38.6	7.14	516	8.5	8.2	324.098	138.748	231.634	0.357037	28.7496	49.8642	103.452	1.21767	0.555244	1.36183	-2.96346	-25.1565
R. Anony	2019-06-28	D	inflowing river			-1.49399	1.62267	0.174288	9.31029	-25.8347	5.23444	25.3333	6.40528	2.02555	-24.5686						656	8.4	8.35	300.755	135.304	236.167	5.03024	19.1946	41.9392	109.228	1.55318	0.542742	0.991056	-2.64299	-23.062
R. Anony	2019-08-08	D	inflowing river			-8.03711								3.39572	-26.1012						638			295.185	134.069	233.682	1.29691	18.4805	40.1154	104.036	0.567777	0.522857	1.00061	-3.095	-25.015
R. Anony	2019-08-26	D	inflowing river			-9.31072	1.71501	0.145392	11.7958	-27.2732	5.9122			1.71535	-24.5013						683	36.4	12.07	338.735	155.996	228.16	9.41683	29.1618	45.1037	108.197	1.43418	0.617603	1.04666	-3.65439	-25.3035
R. Sahabe	2019-03-10	R	inflowing river			-18.0439	1.70122	0.190314	8.93897	-26.6222	4.45335	13.1579	12.9292	2.54893	-26.1522	23.9	90.6	6.84	25.2	7.07	211	302.3	5.55	107.203	37.356	133.912	0.939443	3.9704	26.4867	34.9816	5.09061	0.184446	1.22717	-2.24965
R. Sahabe	2019-03-29	R	inflowing river			-19.5036	0.957279	0.103345	9.26297	-26.2229	5.34386	16.9565	5.64549	2.01411	-26.3221	25.2	45.8	3.36	24.9	7.1	211	406.4	5.16	154.333	41.7239	212.485	1.22281	6.80293	39.2902	48.1662	1.86413	0.221945	1.0466	-5.40702
R. Sahabe	2019-04-06	R	inflowing river			-19.3497	2.2749	0.204468	11.1259	-26.9244	7.17146	20	11.3745	2.08482	-26.2809						215	418.6	5.4	153.205	43.0324	221.506	0.979399	7.07114	36.6496	50.0319	1.65759	0.247281	0.958273	-4.62048	-32.0499
R. Sahabe	2019-05-10	D	inflowing river				1.95096	0.211349	9.23099	-24.5721	6.43799	7.36842	26.4774	2.5572	-24.0345						295			183.757	56.0166	212.498	27.6468	12.6209	42.9321	57.7426	3.43863	0.473307	0.954304	-5.1938	-35.0641
R. Sahabe	2019-08-26	D	inflowing river			-10.9968	0.811654	0.0841608	9.64409	-25.21	6.68012	26	3.12175	3.36219	-27.4979							112.3	9.46	184.764	55.7532	213.544	27.576	12.6324	42.8401	58.043	3.46653	0.468193	0.947725	-5.21979	-34.9438
R. Sahamaloto	2019-03-10	R	inflowing river			-10.6034	1.82444	0.215269	8.47519	-25.5051	4.03191	70.5263	2.5869	2.35457	-23.9083	25.1	62.2	4.7	36.5	7.38	294	26.2	7.32	179.106	48.4613	169.984	0.38081	11.7478	57.0278	36.1967	1.58812	0.243401	1.24799	-4.0206	-28.9475
R. Sahamaloto	2019-03-29	R	inflowing river			-7.72524	1.31486	0.15064	8.72851	-25.403	6.49776	50.9524	2.58058	2.5494	-23.7313	25.3	56.4	4.38	56.4	7.44	339	49	7.09	210.981	61.7412	180.907	0.429063	17.739	56.413	53.7798	3.26612	0.364873	1.28097	-3.06986	-24.9721
R. Sahamaloto	2019-04-06	R	inflowing river			-8.62663	2.02632	0.255553	7.92918	-21.7862	5.68223	30	6.75441	2.56864	-23.9412	27.4	79.1	5.68	55.6	7.5	326	323.8	7.31	231.991	60.8301	181.49	0.396661	19.8481	60.8033	47.0802	2.33807	0.313104	1.2333	-2.9234	-25.174
R. Sahamaloto	2019-04-26	R	inflowing river			-7.76146	1.07403	0.148985	7.20899	-25.4334	7.47843	123.158	0.872078	3.25788	-24.5102	22.1	81.1	6.49	52.5	7.82	413	20.6	8.09	229.028	60.2996	179.824	0.303768	19.104	60.4192	46.7919	3.35096	0.318282	1.26731	-3.58905	-26.8571
R. Sahamaloto	2019-05-10	D	inflowing river				2.48687	0.300213	8.28366	-22.0217	8.36386	13.1579	18.9002	5.28309	-15.2808	25	65.6	4.98	59	7.3	417	80.2	7.49	254.805	81.1064	247.35	0.204994	7.85493	48.1768	60.3108	3.3672	0.410504	1.496	-4.21578	-31.4902
R. Sahamaloto	2019-05-26	D	inflowing river			-7.91135						24.7368		1.76396	-24.7656	24.3	73.2	5.58	49.7	7.47	441	35.9	7.12	317.017	84.5598	243.299	0.222029	14.3209	55.0961	63.1884	0.162347	0.407979	1.21957	-4.52417	-31.5158
R. Sahamaloto	2019-06-04	D	inflowing river			-8.50893	2.25994	0.268117	8.42893	-22.3573	6.48358	25.2381	8.95447	2.58034	-23.6807	25.1	62.2	4.7	36.5	7.38	399	31.1	8.13	264.474	65.6297	259.271	4.85192	5.79315	65.2906	52.9427	2.09162	0.320757	1.148	-4.18907	-31.5407
R. Sahamaloto	2019-06-28	D	inflowing river			-8.3369						15.7143		3.49269	-19.5012	26.4	82.6	6.27	56.8	7.24	452	29.1	7.94	290.515	66.2769	266.641	4.64365	7.11378	69.499	52.6643	2.75503	0.324529	1.10278	-2.92383	-27.2432
R. Sahamaloto	2019-07-05	D	inflowing river			-8.63166	1.12084	0.144543	7.75437	-25.867	5.0065	23.8095	4.70753	2.45446	-22.3919	24.2	84.6	5.36	46.5	7.36	460	27.1	7.98	271.395	67.922	259.649	61.4165	6.88113	66.1937	59.0837	4.73998	0.326195	0.944112	-3.80014	-30.3892
R. Sahamaloto	2019-07-24	D	inflowing river				1.40232	0.149878	9.35644	-24.4417	5.36716	8	17.5291	2.90307	-25.1088	19.6	61.4	3.98	33.4	6.92	612			273.429	77.3341	216.432	0.986944	8.81438	58.4487	58.5305	3.18098	0.377652	1.23593	-2.43489	-21.345
R. Sahamaloto	2019-08-08	D	inflowing river			-9.06123	1.35159	0.151163	8.94128	-23.7695	4.03698	19.4737	6.94059	2.20088	-23.1165	18.4	58.6	5.56	47.4	7.2		86.6	7.76	277.388	69.059	265.098	1.1666	7.73436	79.1672	57.4802	1.10521	0.337038	1.05769	-3.58166	-28.6745
R. Sahamaloto	2019-08-26	D	inflowing river			-5.95868	1.25394	0.120721	10.3871	-26.1632	7.17855	14	8.95672	3.72496	-25.697							56.6	8.46	566.701	70.9849	250.455	38.5206	12.3108	58.0809	56.3874	4.15746	0.339986	1.18499	-4.60613	-31.4079

## Sheet: Lake Alaotra
Station name	Date (mm/dd/yy)	Group	Season	DIC (µmol/L)	pCO2 (ppm)	d13C-DIC	POC (mg/L)	PN (mg/L)	POC/PN	d13C-POC	d15N-PN	TSM (mg/L)	%POC	DOC mg C L-1	d13C-DOC	T°C	DO %L	DO mg/L	C us/cm	pH	TA (µmol/L)	CH4 (nmol/L)	N2O (nmol/L)	Na (µmol L-1)	Mg (µmol L-1)	Si (µmol L-1)	P (µmol L-1)	S (µmol L-1)	K (µmol L-1)	Ca (µmol L-1)	Fe (µmol L-1)	Sr (µmol L-1)	Ba (µmol L-1)	d18O-H2O	d2H-H2O
LW1	2018-08-08	Alaotra	D			-4.05	1.87835	0.197228	9.52372	-28.9434		5.78947		7.85196	-22.0785	24.3	104	8.06	51	8.27	518	17.1	6.08	200.111	84.4829	215.082		22.7543	35.1124	92.1105	39.9717	0.465724	1.19511	-2.1749	-23.3
LW2	2018-05-23	Alaotra	D	608.028	1056.54	-5.991	1.43144	0.172134	8.31588	-28.4689		6.15385	23.2609	7.83993	-22.0069	21	93.4	7.55	50.2	8.12	569	51.6	6	293.795	90.5311	209.923		17.9152	33.9611	100.04	44.5935	0.483108	1.89204	-1.2486	-22.49
LW3	2018-05-23	Alaotra	D	561.864	1580.2	-6.64	1.67165	0.175641	9.51739	-26.9511	3.00138	6.15385	27.1643	9.87578	-22.2082	22.5	89.9	7.12	41.2	7.74	505	8.5	6.31	168.64	94.009	214.929		29.1444	36.9044	85.9241	39.9022	0.677093	1.436	-2.849	-24.28
LW4	2018-05-23	Alaotra	D	727.64	791.033	-6.278	1.42689	0.14741	9.67972	-26.943		6.5	21.9521	8.18825	-22.3454	20.3	101.1	8.44	40.9	6.53	699	4.6	6.69	180.192	75.2196	199.506		20.5041	28.5442	85.3071	27.7236	0.408586	1.11565	-1.8431	-22.49
LW5	2018-05-23	Alaotra	D	557.155	768.684	-4.185	2.34413	0.272541	8.601	-27.2251		9.5	24.675	9.43504	-23.1277	20.7	104.5	8.63	50.1	6.64	529	16.9	6.75	220.749	89.4977	220.563		29.3161	37.7106	95.8481	33.5238	0.471842	1.18302	-0.5668	-19.77
LW6	2019-01-19	Alaotra	R	754.189	2527.54	-7.95643	5.24752	0.5802	9.04432	-25.0677	3.08262	18.6667	28.1117	17.6898	-20.9563	26.7			92.1	7.85	708	53.52	5.74	320.853	129.898	215.809	0.685614	20.8974	71.113	143.82	53.2307	0.571946	1.5413	-1.9855	-19.7
LW7	2019-01-19	Alaotra	R	700.998	2586.2	-7.40086	3.96557	0.358432	11.0637	-24.1253	3.85464	39.3333	10.082	17.1553	-20.322	29.1			90.5	7.97	654	43.8	5.26	281.042	106.999	211.864	0.610356	20.7823	65.5892	118.464	31.8393	0.519704	1.54576	-1.3885	-19.74
LW8	2019-01-19	Alaotra	R	698.191	2680.29	-7.0217	2.52281	0.224215	11.2517	-23.9765	2.73577	13.3333	18.921	18.5565	-20.9079	29.1			89.9	7.88	655	33.71	5.4	351.651	107.668	210.149	0.665818	34.353	69.1185	147.539	29.9371	0.546539	1.52945	-1.1851	-21.05
LW6	2019-02-01	Alaotra	R	894.473	2262.99	-9.24193	2.89312	0.327337	8.83838	-22.1288	8.85346	10	28.9312	15.176	-21.9945	24.8	77	5.92	94.2	6.79	849	26.63	6.69	355.536	147.03	223.703	0.695491	19.079	84.7107	148.032	60.5605	0.651866	1.21115	-0.878	-28.68
LW7	2019-02-01	Alaotra	R	909.381	2443.05	-8.49419	1.95208	0.221869	8.79836	-28.4186		9.5	20.5483	15.0754	-22.2638	24.8	58.4	4.31	127	6.69	861	22.4	5.81	349.873	146.558	223.75	0.578014	19.5884	84.5499	147.644	55.9743	0.6462	1.10958	-1.4087	-30.02
LW8	2019-02-01	Alaotra	R	916.988	2566	-8.6873	1.85625	0.220957	8.40099	-28.559		8.5	21.8383	14.7323	-22.0831	24.8	76.01	5.8	94.4	6.93	869	23.13	6.6	352.759	146.301	224.756	0.707958	18.7433	84.1539	147.357	63.7058	0.650053	1.20538	-1.3398	-29
LW6	2019-08-26	Alaotra	D	766.433	412.69		2.51929	0.240182	10.4891	-28.0875		16.6667	15.1157	9.27314	-23.9007	19.4	76.1	6.9	61.8	7.39	756	32.5	6.5	252.361	102.198	255.962	0.489556	22.8106	31.5071	110.431	32.4243	0.499589	1.03215	0.1264	-2.7598
LW7	2019-08-27	Alaotra	D	331.059	424.523		2.40813	0.236343	10.1892	-26.1769		37.3333		7.45128	-22.1517	20.1	75.4	7.2	72.3	7.45	318	37.4	6.9	247.296	90.0519	229.097	0.569597	18.0669	29.0536	95.7128	20.091	0.436938	1.45938	-0.6259	-7.6347
LW8	2019-08-27	Alaotra	D	527.384	445.537		6.30558	0.625215	10.0855	-23.748		46.6667	13.512	7.97768	-21.7445	21.2	74.3	6.6	74.8	7.32	514	28.42	6.54	291.58	121.277	271.944	0.42347	31.2276	36.8259	118.102	17.6051	0.558958	0.993222	0.5948	2.2365
LW9	2019-09-01	Alaotra	D	701.022	1756.01	-5.24844	3.72462	0.341024	10.9219	-27.6268		31	12.0149	10.525	-24.0157	23.6	76.2	7.1	78.2	7.56	588	526.7	6.63	355.777	124.564	260.624	0.485171	27.0917	31.3258	113.762	18.6243	0.536577	1.59799	0.7101	0.9791
LW9	2019-09-01	Alaotra	D	688.882	1627.56	-6.20817	6.51793	0.603551	10.7993	-27.2792		22.6667	28.7556	10.9259	-23.8434	24.8	77.4	7.3	75.8	7.33	588	528.5	7.1	313.165	124.87	259.256	0.468779	25.0707	28.895	111.925	14.3222	0.545668	0.337797	0.297	0.6578

## Sheet: Lake outflow
Station name	Date (mm/dd/yy)	Season	Group	DIC (µmol/L)	pCO2 (ppm)	d13C-DIC	POC (mg/L)	PN (mg/L)	POC/PN	d13C-POC	d15N-PN	TSM (mg/L)	%POC	%PN	DOC mg C L-1	d13C-DOC	T°C	DO %L	DO mg/L	C µs/cm	pH	TA (µmol/L)	CH4 (nmol/L)	N2O (nmol/L)	Na (µmol L-1)	Mg (µmol L-1)	Si (µmol L-1)	P (µmol L-1)	S (µmol L-1)	K (µmol L-1)	Ca (µmol L-1)	Fe (µmol L-1)	Sr (µmol L-1)	Ba (µmol L-1)	d18O-H2O	d2H-H2O
R. Maningory	2018-04-27	R	outflowing river	779.873	5424.25	-5.93	2.04868	0.207552	9.87069	-26.855		11.5385	17.7552	1.79878	8.20888	-22.2233	22	57.1	4.48	82.1	7.58	580	2012.8	5.28	219.759	88.4203	217.482	2.48532	24.1185	41.5055	94.8864	19.9606	0.475582	1.78287	-2.4014	-23.65
R. Maningory	2018-04-27	R	outflowing river	928.597	6502.61	-6.411	1.61038	0.166294	9.68397	-27.1073		14	11.5027	1.18781	9.41478	-23.255	22.6	49.7	3.93	57.6	7.55	693	950.8	5.35	260.306	94.0217	227.158	0.701394	27.2371	40.0206	100.994	36.1089	0.555569	1.30501	-1.80687	-23.4
R. Maningory	2018-05-19	D	outflowing river	817.124	4005.94	-6.415	1.88486	0.211517	8.91113	-27.4274		22.5	8.37714	0.940076	7.55196	-21.7359	22.3	69.2	5.6	54.3	6.43	671	1134.1	5.42	217.113	96.1537	228.87		28.7746	36.3443	98.0413	38.8966	0.494506	1.16128	-1.6828	-20.57
R. Maningory	2018-06-11	D	outflowing river	792.726	3706.82	-5.424	2.00576	0.226371	8.8605	-26.0304	1.96576	10.9524	18.3135	2.06686	8.09904	-22.0671	20.4	55.7	4.46	53.7	6.64	650	1150.8	6.05	264.58	119.958	281.471		37.9499	36.4662	123.491	31.3112	0.586153	1.17811	-2.08609	-18.18
R. Maningory	2018-06-11	D	outflowing river	788.898	5226.08	-5.629	1.6974	0.164007	10.3495	-26.2066	3.83537	15.2381	11.1392	1.0763	8.05742	-21.8421	20	68.2	5.75	52.6	6.51	585	1143	5.91	226.098	98.5378	240.587		31.4863	34.9373	104.564	33.8229	0.532793	1.06534	-2.22143	-19.14
R. Maningory	2019-01-18	R	outflowing river	484.452	2340.08	-5.29317	3.078	0.338325	9.09776	-23.3278	4.31642	64	4.80937	0.528632	8.54368	-20.221	27.9			84.9	7.66	443	487.41	6.21	326.74	83.1882	274.358	0.47107	83.3671	56.7977	70.7827	14.0358	0.363898	1.03028	2.68633	-3.88
R. Maningory	2019-01-25	R	outflowing river	631.706	5991.57	-5.96937	5.71069	0.507696	11.2483	-25.3583	3.3723	109	5.23917	0.465776	9.80198	-20.2861	26.3	44	3.24	96.1	6.65	534	1494.97	4.87	356.25	119.464	273.501	1.73229	128.211	66.1855	118.551	8.63075	0.543866	1.30443	0.655592	-14.08
R. Maningory	2019-02-02	R	outflowing river	931.33	13398.4	-6.27745	1.23514	0.158613	7.78713	-22.965	7.00462	42.6667	2.89487	0.37175	11.8699	-19.9763	24.3	21.2	1.62	100.2	6.82	702	18163.4	4.22	346.422	129.432	277.858	0.580435	67.7419	79.944	128.772	20.9551	0.613138	1.44585	1.45816	-19.79
R. Maningory	2019-02-08	R	outflowing river	820.229	11966.8	-6.3242	1.88021	0.227538	8.26327	-21.9054	10.5898	46.5	4.04347	0.48933	9.68286	-19.3699	27.4	23.5	1.68	86.9	6.57	641	21574.6	4.87	310.66	113.903	277.805	0.511994	49.5165	61.6871	107.58	17.9629	0.529491	1.19295	-2.03472	-20.12
R. Maningory	2019-02-15	R	outflowing river	774.386	11499	-5.40336	3.29924	0.403967	8.1671	-24.3596	11.8799	17.5	18.8528	2.30838	10.1238	-20.3845	25.4	24.1	1.86	85.7	6.72	589	11028.7	5.04	293.601	104.434	265.077	0.512106	42.6962	56.9236	94.5245	19.2262	0.495453	1.20397	0.0284487	-16.26
R. Maningory	2019-02-20	R	outflowing river	685.824	791.033	-6.5346	3.53812	0.430945	8.21014	-24.5374	3.78629	21.5	16.4564	2.0044	11.1052	-19.9119	25.5	21.8	1.64	85.2	6.98	508	8182.7	4.69	286.218	104.119	280.049	0.475528	39.6001	54.1615	97.663	21.2052	0.499677	1.44028	-0.512845	-16.46
R. Maningory	2018-07-05	D	outflowing river			-5.18	4.37653	0.527344	8.28452	-28.2559	3.05554	12.1053	36.154	4.35632	13.6647	-20.759		38.8	3.3	77.2	6.56	673	409.46	5.83	453.363	147.309	289.682	3.8973	59.8869	75.7913	165.23	27.1032	0.811345	1.16992	0.298669	-6.83
R. Maningory	2018-07-26	D	outflowing river			-1.767	4.4579	0.505849	8.8127	-25.2939	3.76521	25.7895	17.2857	1.96146	9.47465	-21.025		101.7	8.66	61.7	7.22	509	638.96	8.33	267.242	103.528	237.042	0.458762	28.4793	47.3864	98.4029	19.7956	0.506313	1.09558	0.92407	-9.23
R. Maningory	2018-08-11	D	outflowing river			-4.546	4.60868	0.450716	10.2253	-25.9066	5.07853	20.5263	22.4526	2.19579	9.25347	-21.6786		103.5	9.65	56	7.39	558	324.44	7.75	287.944	108.698	263.651	0.40704	35.0272	42.5158	123.295	15.9165	1.10138	0.96273	-0.0528164	-0.97
R. Maningory	2018-08-23	D	outflowing river			-2.826	4.48325	0.520891	8.60689	-26.0931	4.15478	28.9474	15.4876	1.79944	9.43475	-21.7457		96.7	8.25	62.1	7.54	565	261.28	7.32	312.366	114.821	264.405	0.452562	35.6175	47.2036	117.548	17.0976	0.563485	1.34872	0.595174	1.64
R. Maningory	2018-09-08	D	outflowing river			-2.934	7.3152	1.04896	6.97379	-24.7763	2.95994	46.8421	15.6167	2.23934	9.71358	-21.9004		102.4	8.62	60.5	7.23	737	183.48	6.71	306.146	111.395	251.8	0.377898	57.7307	48.4843	143.583	13.7733	0.754472	1.5652	2.05681	0.05
R. Maningory	2018-09-23	D	outflowing river			-2.909	6.14117	0.722313	8.50209	-25.5541	4.83554	51.5789	11.9064	1.4004	7.76092	-21.2152		97.8	8.21	63.9	3.84		7.05	8.03	293.506	103.243	265.051	0.327521	34.1589	38.376	106.233	16.3986	0.503652	1.35895	1.50074	4.44
R. Maningory	2018-10-06	D	outflowing river			-2.844	6.88697	0.748395	9.20231	-24.6003	3.8124	59.4737	11.5799	1.25836	9.81024	-22.9231		104.1	8.47	45.4	3.7	532	6.63	7.26	301.998	102.543	281.529	0.450199	37.8476	42.6454	104.624	18.2246	0.49124	1.22361	2.14532	7.18
R. Maningory	2018-10-23	D	outflowing river			-2.545	8.46663	0.870557	9.72553	-24.4962	4.48311	60	14.1111	1.45093	8.33633	-21.4198		99.7	7.22	45.4		548	7.78	6.75	318.653	105.732	269.897	0.515004	36.2504	47.5175	106.71	12.461	0.514937	1.24813	4.26006	9.19
R. Maningory	2018-11-06	R	outflowing river			-3.24658	9.70663	1.00386	9.66727	-23.8401	2.63691	115.2	8.42589	0.871404	9.44505	-21.3349		97.8	8.2	62.8	3.73	549	11.73	7.66	403.482	100.982	271.109	0.440014	47.0332	72.0946	113.393	11.59	0.491406	1.2446	3.01111	13.67
R. Maningory	2018-11-21	R	outflowing river			-1.18942	9.98588	1.01426	9.85889	-24.3091	4.99819	96.3158	10.3679	1.05306	10.6423	-21.0323		103.8	8.21	69.8	3.26	513	10.43	6.57	395.2	89.4125	333.033	0.432676	75.4642	54.6761	84.5174	12.77	0.427386	0.911853	6.01934	23.2
R. Maningory	2018-12-06	R	outflowing river			-2.80344	7.21199	0.750363	9.60533	-23.9715	4.56417	67	10.7642	1.11994	10.6384	-20.7625		38	2.93	74.1	6	443	14.99	11.14	399.909	90.3665	327.836	0.439847	72.5653	55.2068	86.3251	12.7747	0.382794	0.825918	4.30368	23.73
R. Maningory	2018-12-23	R	outflowing river			-2.33387	2.59253	0.269828	9.60805	-24.2533	12.0668	88.9474	2.91467	0.303357	12.7934	-21.1967		10.4	0.82	89.5	6.99	419	1.94	12.67	469.159	78.191	369.129	0.486273	92.7317	65.1112	92.6946	7.66618	0.375351	0.979603	4.9707	27.16
R. Maningory	2019-01-06	R	outflowing river			0.241	6.8496	0.712463	9.61397	-24.1745	4.30037	87.8947	7.79296	0.810587	10.018	-21.0429		10.8	0.96	90.2	6.36	361	17.48	18.14	395.366	62.9892	294.608	0.595227	84.4175	60.549	77.2037	8.03584	0.353709	0.953247	2.54738	11.14
R. Maningory	2019-01-06	R	outflowing river									5.78947											5.82	17.19
R. Maningory	2019-03-08	R	outflowing river			-6.41642	1.95691	0.20817	9.40052	-26.884	4.02685	19.4737	10.049	1.06898	8.80888	-21.6502	23.9	56.5	4.17	65.7	7.19	438	60.4	5.08	270.036	109.474	244.006	0.501637	20.0075	36.5147	110.951	16.5792	0.523092	0.976894	0.0458873	-4.55636
R. Maningory	2019-03-29	R	outflowing river			-6.41742	1.97867	0.18683	10.5907	-27.0336	8.56648	6.31579	31.3289	2.95815	9.03739	-22.0642	28.4	70.6	5.28	59.2	7.25	469	548.4	6.34	269.417	101.842	248.176	0.631636	31.6925	47.2364	95.8987	41.4363	0.530707	1.59732	-1.35786	-14.9863
R. Maningory	2019-04-06	R	outflowing river			-8.23127	2.54535	0.274845	9.26102	-25.0674	2.21545	25.2632	10.0753	1.08793	9.62026	-22.5619	26.2	60.4	5.42	58.9	7.1	683	533.8	6.3	266.719	101.404	253.257	0.625892	33.637	46.1955	95.671	41.6138	0.543935	1.60767	-0.661526	-13.8161
R. Maningory	2019-04-26	R	outflowing river			-8.45359	1.50942	0.125533	12.024	-26.6191	6.7561	16.3158	9.25128	0.769399	9.32721	-22.4311	20.5	63.9	5.27	55.3	7.17	618	24.1	13.34	434.243	96.749	346.337	0.656101	79.9039	62.3277	94.9759	13.8211	0.445652	0.955013
R. Maningory	2019-05-10	D	outflowing river				1.84981	0.170064	10.8772	-27.0113	5.17062	33.1579	5.5788	0.51289	7.77168	-21.3791	18.5	5	0.43	98	7.22	485	9	7.33	274.9	110.404	243.009	0.572546	20.6695	36.9278	111.337	25.4032	0.525996	1.02879	0.0331027	-3.90725
R. Maningory	2019-05-26	D	outflowing river			-3.93156						11.5789			8.84044	-21.6043	18.6	16.3	1.44	55.4	7.52	557	88	7.34	300.94	107.76	243.484	3.79158	21.8127	44.1012	103.81	22.6651	0.513939	1.21895	-0.233101	-9.15534
R. Maningory	2019-06-04	D	outflowing river			-6.28865	2.82535	0.285363	9.90089	-24.9765	2.55483	42.381	6.66655	0.673328	7.694	-21.3331	22.6	58.3	4.29	60.4	7.12	508	11.1	7.24	299.49	106.703	243.822	3.9799	21.0449	43.7779	102.7	22.5295	0.509333	1.2191	0.553151	-3.1796
R. Maningory	2019-06-28	D	outflowing river			-6.29469	3.52884	0.379867	9.28969	-25.585	3.7523	35.2632	10.0072	1.07723	10.0723	-19.7772	19.8	60.3	5.14	64.6	6.78	555	23.7	7.58	288.997	111.414	251.212	4.00869	21.3084	40.7579	107.217	25.1888	0.533262	1.10213	1.01936	-1.55287
R. Maningory	2019-07-05	D	outflowing river			-6.01099	4.82715	0.517115	9.33477	-25.3394	6.284	16.1905	29.8148	3.19395	8.07455	-21.2731	20.3	70.6	6.3	61.3	7.1	551	18.8	7.24	295.176	115.439	252.052	0.527636	23.1949	39.0525	113.637	17.9664	0.550634	1.04401	0.347177	-3.25561
R. Maningory	2019-07-24	D	outflowing river				6.1676	0.625359	9.86248	-24.0192	3.28527	39.0476	15.7951	1.60153	9.99509	-21.9091	20.6	69.3	6.8	21.7	6.78	578			315.556	120.661	252.182	1.90626	26.2155	42.231	109.08	21.7555	0.545073	1.15344	0.805291	-0.456321
R. Maningory	2019-08-08	D	outflowing river			-7.49688	5.18537	0.552173	9.39085	-24.5266	3.64795	30.4762	17.0145	1.81182	9.48003	-21.5997	20.3	77.1	6.48	61.4	7.02	643	14.9	7.54	312.463	118.68	246.957	5.82907	24.7337	44.4801	108.935	22.0887	0.551355	1.11542	0.275583	-1.79716
R. Maningory	2019-08-26	D	outflowing river			-5.54622	3.83707	0.430298	8.91725	-24.2891	3.93871	56	6.85192	0.768389	10.5033	-21.8817						618	3961.8	6.63	296.164	114.676	252.818	0.883012	34.8246	42.4808	112.012	29.8152	0.579383	1.18559	0.953166	0.678916
R. Maningory	2019-09-08	D	outflowing river																						275.919	101.865	252.32	0.559186	34.1045	52.5695	88.2931	41.034	0.479049	1.37178	-0.510526	-13.7515
R. Maningory 2	2018-05-19	D	outflowing river	776.975	5799.99	-6.677	2.04977	0.225588	9.08638	-26.0038	3.58764	16	12.8111	1.40992	9.16857	-23.0096	21.8	57.6	4.67	56.1	6.42	562	991	5.28	220.037	98.7383	234.909		31.3281	37.1955	104.869	34.673	0.516854	1.20576

## Sheet: Chl a and POC
Station name	Date (mm/dd/yy)	Group	Chla (µg/L)	POC (mg/L)	POC/chl-a (µg L-1/ µgL-1)
LW3	2018-05-23	Alaotra	8.52407	1.67165	196.109
LW4	2018-05-23	Alaotra	9.9561	1.42689	143.318
LW6	2019-01-19	Alaotra	9.30456	5.24752	563.972
LW7	2019-01-19	Alaotra	7.96132	3.96557	498.105

## Sheet: NPP
Date	Station name	Secchi depth(m)	Chla (µg/L)	Light attenuation (/m)	Ze (m)	Pmax (µgC/L/h)	Ik (µE/m2/s)	PP with daily Io (mgC/m2/d)	PP with cruise-averaged Io (mgC/m2/d)	NNP (gC/m2/year)
2018-08-08	LW 1	0.4		2.8525	1.61443	38.5388	153.863	283.678	297.228	100.989
2018-05-23	LW 2	0.5		2.282	2.01804	26.8169	247.447	203.482	219.755	72.4397
2018-05-23	LW 3	0.4	8.52407	2.8525	1.61443	24.1014	160.565	179.872	183.581	64.0346
2018-05-23	LW 4	0.4	9.9561	2.8525	1.61443	16.342	84.7105	140.085	144.463	49.8702
2019-01-19	LW 5	0.5		2.282	2.01804	91.4555	258.69	679.365	736.074	241.854
2019-01-19	LW 6	0.5	9.30456	2.282	2.01804	99.1827	275.802	713.709	777.063	254.08
2019-08-27	LW 7	0.5	7.96132	2.282	2.01804	21.3275	180.747	185.118	195.757	65.902
2019-09-01	LW 8	0.4		2.8525	1.61443	162.454	155.162	1227.62	1249.93	437.034
2019-09-01	LW 9	0.4		2.8525	1.61443	163	264	1035.62	1040.7	368.682

## Sheet: Marsh sediment cores
Location	Core	Top Depth (cm)	C%	N %	C/N	d13C	d15N
Marshes/wetlands	SC-M1	0	21.932	1.5294	14.3405	-22.364	0.8328
Marshes/wetlands	SC-M1	1	26.3079	1.8253	14.4131	-22.2648	0.6504
Marshes/wetlands	SC-M1	2	27.4547	1.8454	14.8771	-22.0016	0.7609
Marshes/wetlands	SC-M1	3	33.916	2.0948	16.1904	-21.5704	0.8906
Marshes/wetlands	SC-M1	4	36.2428	2.0854	17.3795	-21.6179	0.6078
Marshes/wetlands	SC-M1	5	31.5178	1.8495	17.0408	-21.1168	0.8795
Marshes/wetlands	SC-M1	6		0.6633		-20.638	0.5946
Marshes/wetlands	SC-M1	7	33.3982	1.8489	18.0642	-20.5337	0.5125
Marshes/wetlands	SC-M1	8	32.6732	1.8804	17.3761	-19.7613	-1.0272
Marshes/wetlands	SC-M1	9	28.0671	1.4703	19.0889	-19.0466	0.6585
Marshes/wetlands	SC-M1	10	28.6189	1.5078	18.9807	-18.6498	0.9028
Marshes/wetlands	SC-M1	11	26.3041	1.3641	19.283	-18.176	0.774
Marshes/wetlands	SC-M1	12	31.6278	1.5607	20.2654	-17.8379	0.0331
Marshes/wetlands	SC-M1	13	32.8932	1.5252	21.5669	-17.0209	0.1709
Marshes/wetlands	SC-M1	14	29.549	1.4239	20.7528	-18.1112	0.3797
Marshes/wetlands	SC-M1	15	25.1632	1.3553	18.5671	-19.4779	0.7355
Marshes/wetlands	SC-M1	16	22.9235	1.328	17.2622	-19.9405	0.8866
Marshes/wetlands	SC-M1	17		2.8275		-19.9061	1.0416
Marshes/wetlands	SC-M1	18	27.7076	1.3333	20.7808	-19.82	1.4218
Marshes/wetlands	SC-M1	19	24.5775	1.2737	19.2964	-19.8028	1.3498
Marshes/wetlands	SC-M1	20	23.9789	1.2824	18.6987	-19.6449	1.6448
Marshes/wetlands	SC-M1	21	20.8564	1.2406	16.8108	-19.8393	1.5363
Marshes/wetlands	SC-M1	22	23.0832	1.3297	17.3603	-19.896	1.7106
Marshes/wetlands	SC-M1	23	21.0417	1.2626	16.665	-19.9739	1.813
Marshes/wetlands	SC-M1	24	20.9026	1.2284	17.0166	-19.9901	1.7086
Marshes/wetlands	SC-M1	25	20.1102	1.1792	17.0542	-20.0316	1.7867
Marshes/wetlands	SC-M1	26	17.1994	1.0965	15.6864	-20.0539	1.959
Marshes/wetlands	SC-M1	27	16.1409	1.033	15.6252	-19.8089	2.2276
Marshes/wetlands	SC-M1	28	15.8453	1.0271	15.4278	-19.6884	2.5286
Marshes/wetlands	SC-M1	29	15.5126	0.9969	15.5615	-19.5113	2.5195
Marshes/wetlands	SC-M1	30	14.2358	0.9594	14.8375	-19.4667	2.5205
Marshes/wetlands	SC-M1	31	12.9187	0.9321	13.8597	-19.7836	2.4871
Marshes/wetlands	SC-M1	32	11.4814	0.8597	13.3558	-19.5285	2.7658
Marshes/wetlands	SC-M1	33	11.8868	0.8855	13.424	-19.0395	2.93
Marshes/wetlands	SC-M1	34	12.5608	0.9187	13.6718	-18.5273	3.1449
Marshes/wetlands	SC-M1	35	12.6057	0.9035	13.9526	-18.3714	3.146
Marshes/wetlands	SC-M1	36	12.2326	0.8906	13.7353	-18.6629	3.3882
Marshes/wetlands	SC-M1	37	15.9365	1.0162	15.6818	-18.8421	3.7227
Marshes/wetlands	SC-M1	38	17.2804	1.0356	16.6857	-18.7581	3.967
Marshes/wetlands	SC-M1	39	18.8632	1.1525	16.3673	-18.8573	4.0562
Marshes/wetlands	SC-M1	40	17.092	1.0548	16.2034	-18.2438	3.5778
Marshes/wetlands	SC-M1	41	13.6525	0.8319	16.4104	-18.6528	3.7876
Marshes/wetlands	SC-M1	42		1.63		-18.3592	3.4967
Marshes/wetlands	SC-M2	0	25.0747	1.51687	16.5306	-19.3977	0.872044
Marshes/wetlands	SC-M2	1	27.9005	1.70074	16.4049	-19.6423	1.26826
Marshes/wetlands	SC-M2	2	28.8925	1.82818	15.804	-19.7148	1.28061
Marshes/wetlands	SC-M2	3	29.4508	1.69956	17.3285	-19.7088	0.0353532
Marshes/wetlands	SC-M2	4	31.6399	1.86534	16.9621	-19.7148	1.22195
Marshes/wetlands	SC-M2	5	37.0336	2.28076	16.2374	-20.0612	1.19005
Marshes/wetlands	SC-M2	7	31.9431	1.84603	17.3036	-19.7018	1.19005
Marshes/wetlands	SC-M2	10	25.7966	1.41305	18.256	-19.9142	1.20034
Marshes/wetlands	SC-M2	11	21.6857	1.19345	18.1706	-19.4057	1.19828
Marshes/wetlands	SC-M2	12	30.638	1.56532	19.5729	-19.1943	0.944083
Marshes/wetlands	SC-M2	13	30.6887	1.68669	18.1947	-19.3574	1.15814
Marshes/wetlands	SC-M2	14	30.7576	1.60886	19.1177	-19.5437	1.42263
Marshes/wetlands	SC-M2	15	29.5354	1.57591	18.7418	-19.6877	1.43087
Marshes/wetlands	SC-M2	16	22.8177	1.25357	18.2021	-19.6907	2.07511
Marshes/wetlands	SC-M2	17	23.2639	1.26346	18.4129	-19.2829	1.90118
Marshes/wetlands	SC-M2	18	24.2375	1.27144	19.0631	-19.3977	1.66345
Marshes/wetlands	SC-M2	19	18.3159	1.11561	16.4178	-19.6423	2.16053
Marshes/wetlands	SC-M2	20	17.5538	1.04929	16.7292	-19.7148	2.45898
Marshes/wetlands	SC-M2	21	11.0477	0.674528	16.3784	-19.7088	2.46618
Marshes/wetlands	SC-M2	22	13.5626	0.819304	16.5538	-19.7148	2.37767
Marshes/wetlands	SC-M2	23	22.4434	1.29257	17.3634	-19.7088	2.27682
Marshes/wetlands	SC-M2	24	20.8805	1.18317	17.6479	-20.0612	1.99483
Marshes/wetlands	SC-M2	25	17.8725	1.02983	17.3548	-19.7018	2.38591
Marshes/wetlands	SC-M2	26	17.0317	1.04747	16.2598	-19.9142	2.35092
Marshes/wetlands	SC-M2	27	18.1125	1.05585	17.1544	-19.4057	2.52793
Marshes/wetlands	SC-M2	28	17.2275	1.01088	17.0421	-19.1943	2.56704
Marshes/wetlands	SC-M2	29	18.9845	1.0875	17.4569	-19.3574	2.63496
Marshes/wetlands	SC-M2	30	14.9127	0.900808	16.5548	-19.5437	2.64937
Marshes/wetlands	SC-M2	31	13.0605	0.795164	16.4249	-19.6877	2.46618
Marshes/wetlands	SC-M2	32	14.1849	0.83927	16.9015	-19.6907	2.56601
Marshes/wetlands	SC-M2	33	14.9963	0.926512	16.1858	-19.2829	2.3962
Marshes/wetlands	SC-M2	34	16.1509	0.947148	17.0521	-19.0603	2.53719
Marshes/wetlands	SC-M2	35	18.5011	1.08348	17.0756	-19.5547	2.85622
Marshes/wetlands	SC-M2	36	16.5404	1.00536	16.4523	-19.3745	2.75331
Marshes/wetlands	SC-M2	37	15.5435	0.973712	15.9631	-19.0613	2.78418
Marshes/wetlands	SC-M2	38	15.486	0.99201	15.6107	-19.2124	2.92929
Marshes/wetlands	SC-M2	39	15.8584	0.972299	16.3102	-19.881	2.75022
Marshes/wetlands	SC-M2	40	17.4664	1.01664	17.1805	-19.4933	2.87784
Marshes/wetlands	SC-M2	41	19.0567	1.16156	16.4062	-19.2456	3.11351
Marshes/wetlands	SC-M2	43	10.7817	0.716351	15.0509	-19.3362	3.37491
Marshes/wetlands	SC-M2	44	13.0344	0.778298	16.7472	-19.0251	4.00577
Marshes/wetlands	SC-M2	45	13.7464	0.827259	16.6168	-19.2537	4.29496
Marshes/wetlands	SC-M2	47	10.548	0.604094	17.4608	-19.9142	4.17044
Marshes/wetlands	SC-M3	0	14.521	0.882255	16.4589	-19.4373	1.83425
Marshes/wetlands	SC-M3	2	14.9462	1.05226	14.2039	-19.1666	1.85639
Marshes/wetlands	SC-M3	4	16.9595	0.812137	20.8826	-23.0733	0.867164
Marshes/wetlands	SC-M3	6	15.1567	1.08559	13.9617	-19.9429	1.88356
Marshes/wetlands	SC-M3	8	16.7196	0.928771	18.0019	-18.2838	1.06541
Marshes/wetlands	SC-M3	10	13.2197	0.890404	14.8469	-18.1793	0.762505
Marshes/wetlands	SC-M3	11	13.5177	0.866133	15.6069	-17.0124	1.4921
Marshes/wetlands	SC-M3	14	11.4098	0.813568	14.0244	-17.8455	1.54241
Marshes/wetlands	SC-M3	16	11.0818	0.762957	14.5249	-18.6796	1.31599
Marshes/wetlands	SC-M3	18	10.3729	0.704391	14.726	-18.568	1.11673
Marshes/wetlands	SC-M3	19	10.0242	0.677305	14.8001	-19.3757	1.1912
Marshes/wetlands	SC-M3	20	9.28524	0.602584	15.409	-18.5436	1.34215
Marshes/wetlands	SC-M3	21	9.82735	0.613166	16.0272	-18.7892	1.33008
Marshes/wetlands	SC-M3	23	9.27619	0.589096	15.7465	-17.7724	1.81513
Marshes/wetlands	SC-M3	24	10.039	0.649063	15.4669	-17.884	3.73924
Marshes/wetlands	SC-M3	26	8.02246	0.484785	16.5485	-17.9936	1.54745
Marshes/wetlands	SC-M3	29	5.6937	0.369083	15.4266	-18.158	1.24957
Marshes/wetlands	SC-M3	30	8.17069	0.532532	15.3431	-18.3133	1.76683
Marshes/wetlands	SC-M3	31	8.48454	0.518303	16.3698	-18.8419	1.71047
Marshes/wetlands	SC-M3	33	7.42164	0.471478	15.7412	-18.2209	1.60078
Marshes/wetlands	SC-M3	37	7.3098	0.455483	16.0485	-18.0139	1.56455
Marshes/wetlands	SC-M3	38	7.13893	0.449982	15.8649	-18.7263	1.79601
Marshes/wetlands	SC-M3	41	7.55267	0.468123	16.134	-18.8643	1.58367
Marshes/wetlands	SC-M3	42	7.15492	0.419474	17.0569	-18.6207	1.58871
Marshes/wetlands	SC-M3	49	8.36361	0.498719	16.7702	-18.5426	1.29184
Marshes/wetlands	SC-M3	50	7.78133	0.457521	17.0076	-18.5466	1.70846
Marshes/wetlands	SC-M3	52	8.14191	0.461677	17.6355	-18.6613	1.52027
Marshes/wetlands	SC-M3	53	7.09796	0.399585	17.7633	-18.8298	1.19322
Marshes/wetlands	SC-M3	54	7.88631	0.42052	18.7537	-18.2605	1.05334
Marshes/wetlands	SC-M3	59	8.34806	0.469873	17.7666	-18.777	0.95874
Marshes/wetlands	SC-M3	60	10.7045	0.619707	17.2735	-18.4634	1.22341
Marshes/wetlands	SC-M3	62	10.9448	0.590205	18.544	-18.9358	0.817854
Marshes/wetlands	SC-M3	63	9.19686	0.553681	16.6104	-18.8531	0.68703
Marshes/wetlands	SC-M3	64	9.82139	0.55179	17.7991	-18.7861	0.625644
Marshes/wetlands	SC-M3	69	17.8758	1.22071	14.6438	-20.3407	0.0631035
Marshes/wetlands	SC-M3	73	28.4277	1.90652	14.9107	-20.0779	-0.818445
Marshes/wetlands	SC-M3	75	33.0331	1.53639	21.5005	-19.2214	-0.402829
Marshes/wetlands	SC-M3	76	25.8277	1.79813	14.3636	-20.1834	0.292548
Marshes/wetlands	SC-M3	80	50.9999	1.42386	35.8182	-17.6121	0.617593
Marshes/wetlands	SC-M3	82	33.4212	2.13357	15.6644	-20.0393	0.998994
Marshes/wetlands	SC-M3	83	36.6429	1.66945	21.9491	-16.8208	-0.0314919
Marshes/wetlands	SC-M3	100	41.1243	1.75812	23.3911	-18.6146	-0.947255
Marshes/wetlands	SC-M3	102	43.8727	1.85549	23.6448	-19.3158	-0.964363
Marshes/wetlands	SC-M3	103	35.5267	1.49422	23.7761	-16.9231	-0.808381
Marshes/wetlands	SC-M3	104	35.3588	1.56103	22.651	-16.8145	-0.370626
Marshes/wetlands	SC-M3	105	41.862	2.13327	19.6234	-16.088	-0.315278
Marshes/wetlands	SC-M3	108	46.9105	1.88612	24.8714	-15.952	-0.678564
Marshes/wetlands	SC-M3	109	41.2037	1.49297	27.5984	-15.61	-0.53969
Marshes/wetlands	SC-M3	112	48.476	2.23057	21.7326	-16.6633	-0.487361
Marshes/wetlands	SC-M3	114	39.5798	1.74255	22.7136	-16.363	0.134553
Marshes/wetlands	SC-M3	117	49.2975	1.48791	33.1321	-17.1605	-1.03481
Marshes/wetlands	SC-M3	119	44.1086	1.4583	30.2466	-16.5629	-0.421949
Marshes/wetlands	SC-M3	122	51.4066	1.86362	27.5843	-15.8769	-0.260936
Marshes/wetlands	SC-M3	127	47.2822	2.06019	22.9504	-16.5608	0.0480085
Marshes/wetlands	SC-M3	134	52.3601	1.93841	27.0119	-17.6324	-0.64133
Marshes/wetlands	SC-M3	137	49.3172	1.04659	47.1219	-19.9581	-0.758065
Marshes/wetlands	SC-M3	138	58.763	2.12969	27.5923	-17.4061	0.00473615
Marshes/wetlands	SC-M3	140	53.0945	1.50935	35.177	-17.3919	-0.59202
Marshes/wetlands	SC-M3	141	44.8011	1.03214	43.4062	-17.4812	-0.877818
Marshes/wetlands	SC-M3	142	47.9578	2.22928	21.5127	-16.4797	-0.433019
Marshes/wetlands	SC-M3	143	49.7019	1.43705	34.5861	-16.9941	-0.568874
Marshes/wetlands	SC-M3	144	45.3626	1.69675	26.735	-16.1773	-1.44036
Marshes/wetlands	SC-M3	146	52.2114	1.27168	41.0569	-17.7318	-0.802343
Marshes/wetlands	SC-M3	147	51.9422	1.41429	36.7267	-17.8252	-0.398804
Marshes/wetlands	SC-M3	148	51.6133	1.33751	38.5891	-16.3345	-1.40614
Marshes/wetlands	SC-M3	149	52.5803	1.42221	36.9708	-17.5238	-0.799324
Marshes/wetlands	SC-M3	158	51.6476	1.50109	34.4067	-17.9652	-0.72083
Marshes/wetlands	SC-M3	160	52.6775	1.22424	43.0288	-21.2884	-0.759071
Marshes/wetlands	SC-M3	161	51.1696	1.32571	38.598	-16.9698	-1.10223
Marshes/wetlands	SC-M3	162	52.0771	1.37905	37.763	-16.7912	-1.05594
Marshes/wetlands	SC-M3	164	41.1673	1.22207	33.6866	-17.0479	-0.891907
Marshes/wetlands	SC-M3	169	51.2995	1.77395	28.9182	-17.2356	-0.461196
Marshes/wetlands	SC-M3	170	53.0086	1.77104	29.9308	-15.9652	-0.832533
Marshes/wetlands	SC-M3	171	43.2881	1.3072	33.1152	-15.8881	-0.936186
Marshes/wetlands	SC-M3	173	45.4569	1.34281	33.852	-15.7237	-0.450127
Marshes/wetlands	SC-M3	174	52.3122	1.67392	31.2513	-15.7267	-1.63559
Marshes/wetlands	SC-M3	175	50.7105	1.41117	35.9351	-15.6242	-1.48262
Marshes/wetlands	SC-M3	176	42.0813	1.43296	29.3667	-16.4178	-0.688628

## Sheet: Marsh vegetation
Localisation	Scientific Name	% Cover / Localisation	%C	%N	C/N	δ13C	δ15N
Marshes	Cyperus madagsacariensis	0.5	41.599	0.735734	56.5408	-13.2436	2.85138
Marshes	Cyperus leucocephalus		40.7779	0.819274	22.9202	-12.4115	2.60206
Marshes	Cyclosorus gongylodes		40.5378	1.939	20.9065	-29.4679	0.373968
Marshes	Argyreia vahibora		43.685	1.88588	23.1643	-29.4495	3.5402
Marshes	Argyreia Vahibora	0.3	42.8084	3.5442	12.0784	-29.0007	5.41952
Marshes	Polygnum glabrum		44.9631	2.73238	16.4556	-29.516	5.0111
Marshes	Nymphaea lily		40.0342	2.89338	13.8365	-24.1334	1.80646
Marshes	Eichhornia crassipes		37.8154	3.01762	12.5315	-31.0863	6.16053
