# Supplementary material for: Biogeochemical functioning of Lake Alaotra (Madagascar): a reset of aquatic carbon sources along the land–ocean aquatic continuum
Source: Copernicus journal article supplement (doi:10.5194/bg-22-2403-2025), 2025-05-27
Supplement: Supplementary file 1 [file bg-22-2403-2025-supplement.zip]

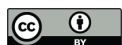

*Supplement of*

**Biogeochemical functioning of Lake Alaotra (Madagascar): a reset of aquatic carbon sources along the land–ocean aquatic continuum**

**Vao Fenotiana Razanamahandry et al.**

*Correspondence to:* Vao Fenotiana Razanamahandry (razfenotiana@gmail.com) and Steven Bouillon (steven.bouillon@kuleuven.be)

- [bg-22-2403-2025-supplement-title-page.pdf](#)
- [Data for\\_Biogeochemichal fonctionning of Lake Alaotra\\_070924.xlsx](#)
- [Supplementary figures and methods.pdf](#)

The copyright of individual parts of the supplement might differ from the article licence.
